19 **ABSTRACT**

20 The insect immune deficiency (IMD) pathway is a defense mechanism that senses and  
21 responds to Gram negative bacteria. Ticks lack genes encoding upstream components that  
22 initiate the IMD pathway. Despite this deficiency, core signaling molecules are present and  
23 functionally restrict tick-borne pathogens. The molecular events preceding activation remain  
24 undefined. Here, we show that the Unfolded Protein Response (UPR) initiates the IMD network  
25 in *Ixodes scapularis* ticks. The endoplasmic reticulum (ER) stress receptor, IRE1 $\alpha$ , is  
26 phosphorylated in response to tick-borne bacteria, but does not splice the mRNA encoding  
27 XBP1. Instead, through protein modeling and reciprocal pulldowns, we show that *Ixodes* IRE1 $\alpha$   
28 complexes with TRAF2. Disrupting IRE1 $\alpha$ -TRAF2 signaling blocks IMD pathway activation and  
29 diminishes the production of reactive oxygen species. Through *in vitro*, *in vivo*, and *ex vivo*  
30 techniques we demonstrate that the UPR-IMD pathway circuitry limits the Lyme disease-  
31 causing spirochete *Borrelia burgdorferi* and the rickettsial agents *Anaplasma phagocytophilum*  
32 and *A. marginale* (anaplasmosis). Altogether, our study uncovers a novel linkage between the  
33 UPR and the IMD pathway in ticks.

## 34 INTRODUCTION

35 Arthropod-borne diseases continue to be a substantial source of morbidity and mortality  
36 worldwide<sup>1</sup>. Factors influencing the ability of arthropods to harbor and transmit pathogens are  
37 incompletely understood, although progress on this front has been made in recent years.  
38 Arthropod immunity is an important force in shaping vector competency<sup>2-8</sup>. For example,  
39 humoral defense networks such as the Immune Deficiency (IMD) pathway recognize and restrict  
40 invading microbes. As classically defined in *Drosophila melanogaster*, IMD pathway signaling  
41 events are similar to the tumor necrosis factor receptor (TNFR) pathway in mammals, but  
42 instead respond to the Gram negative bacterial PAMP (pathogen-associated molecular  
43 patterns), DAP (diaminopimelic acid)-type peptidoglycan<sup>9,10</sup>. Pathway initiating receptors PGRP-  
44 LC and PGRP-LE (peptidoglycan recognition proteins LC and LE) recruit adapter molecules  
45 IMD and FADD (fas-associated protein with death domain)<sup>11,12</sup>, the latter pairing with DREDD  
46 (death-related ced-3/Nedd2-like protein)<sup>13</sup> which cleaves IMD. The E3 ubiquitin ligase IAP2  
47 (inhibitor of apoptosis 2) and E2 conjugating enzymes Bendless, Uev1a, and Effette then  
48 promote (K)63 polyubiquitylation of IMD<sup>9,10,14</sup>. The resulting signaling scaffold leads to cleavage  
49 of the NF- $\kappa$ B signaling molecule Relish, which translocates to the nucleus and promotes  
50 antimicrobial peptide (AMP) expression<sup>10,14</sup>.

51 Significant advances in characterizing arthropod immunity have been possible owing to  
52 the insect model organism, *Drosophila*. However, deviations from classically defined fly  
53 immunity have been reported. For example, some IMD pathway components are not found in  
54 the genomes of arachnids (ex. mites, spiders, etc.) or several hemimetabolous insects such as  
55 lice, bed bugs, psyllids, squash bugs, and whiteflies<sup>15-27</sup>. Triatomine bugs recently had many  
56 IMD pathway components identified, but are missing the gene encoding IMD itself<sup>32-34</sup>. *Ixodes*  
57 *scapularis* ticks lack genes encoding upstream regulators of the IMD pathway including  
58 transmembrane *PGRPs*, *imd*, and *fadd*<sup>15,27,28,30</sup>. Despite the absence of upstream regulators,

59 core IMD signaling molecules are active against infection<sup>28,30,33–35</sup>. Activity of the *Ixodes* IMD  
60 pathway hinges on Bendless, Uev1a, XIAP (X-linked inhibitor of apoptosis), p47, Relish, and the  
61 negative regulator Caspar, which functionally restricts tick-borne pathogens *Borrelia burgdorferi*  
62 (Lyme disease) and *Anaplasma phagocytophilum* (granulocytic anaplasmosis)<sup>5,28,30,31</sup>. In the  
63 absence of classically defined pathway initiators, functionality of the core IMD cascade suggests  
64 that an alternative mode of activation exists.

65 Cellular stress responses are well-conserved across eukaryotes and respond to adverse  
66 environmental conditions, such as infection<sup>36–45</sup>. Herein, we demonstrate that a stress-response  
67 network, the Unfolded Protein Response (UPR), initiates the IMD pathway in *I. scapularis* ticks.  
68 *B. burgdorferi* and *A. phagocytophilum* activate the endoplasmic reticulum (ER) stress receptor  
69 IRE1 $\alpha$  (inositol-requiring enzyme 1 $\alpha$ ), which pairs with a TRAF2-like (TNF receptor associated  
70 factor 2-like) signaling molecule (hereafter referred to as *Ixodes* TRAF2). Through molecular  
71 modeling, biochemical interactions, pharmacological manipulations, and RNAi, we show that the  
72 *Ixodes* IRE1 $\alpha$ -TRAF2 axis functionally restricts *B. burgdorferi* and *A. phagocytophilum* in ticks,  
73 induces the IMD pathway NF- $\kappa$ B factor Relish, and initiates production of antimicrobial effectors.  
74 IRE1 $\alpha$ -TRAF2 signaling also restricts the cattle pathogen *Anaplasma marginale* in *Dermacentor*  
75 *andersoni* ticks. Collectively, we show a fundamentally distinct mode of IMD pathway activation  
76 that explains how core signaling is activated independent of canonical upstream regulators.

## 77 RESULTS

### 78 *The Ixodes UPR responds to tick-borne pathogens and restricts bacterial colonization*

79 The absence of IMD pathway initiating molecules led us to hypothesize that the core  
80 signaling components may be induced through crosstalk with other molecular circuits. The UPR  
81 is a response network that is activated by ER stress through the transmembrane receptors  
82 IRE1 $\alpha$ , PERK (PKR-like ER kinase), and ATF6 (Activating transcription factor 6). In a non-

83 stressed state, the sensor molecule BiP (binding immunoglobulin protein) keeps all receptors  
84 inactive by binding to them<sup>36–38</sup> (Fig 1A). ER stress causes BiP to disassociate from UPR  
85 receptors, allowing downstream signaling to ensue<sup>36,46–48</sup>. This also results in upregulated  
86 expression of many UPR components, including BiP, with the goal of restoring cellular  
87 homeostasis<sup>36–38,42,49–51</sup>. To evaluate whether tick-borne pathogens induce the UPR in *I.*  
88 *scapularis*, we quantified gene expression in *A. phagocytophilum*-infected nymphs. Relative to  
89 uninfected ticks (dotted baseline), significant increases were observed with *BiP*, *ire1a*, and *traf2*,  
90 suggesting that the tick UPR responds to infection (Fig 1B).

91 To determine how the UPR impacts pathogen survival in ticks, we used pharmacological  
92 inducers or RNAi with the ISE6 *I. scapularis* cell line. Tick cells were treated with low doses of  
93 either thapsigargin or tunicamycin to induce ER stress prior to *A. phagocytophilum* infection.  
94 Thapsigargin inhibits the sarco/endoplasmic reticulum Ca<sup>2+</sup> ATPase (SERCA), which decreases  
95 calcium levels in the ER<sup>52</sup>. Tunicamycin blocks N-linked glycosylation, leading to an increase of  
96 misfolded proteins<sup>53</sup>. Both treatments resulted in significantly less *A. phagocytophilum* (Fig 1C-  
97 D). We also used an RNAi-based approach to over activate the UPR by decreasing expression  
98 of the negative regulator BiP. In agreement with pharmacological induction, transcriptional  
99 silencing of BiP caused a decrease in *A. phagocytophilum* colonization (Fig 1E). Altogether, this  
100 demonstrates that *A. phagocytophilum* induces the UPR in ticks, which functionally restricts  
101 bacterial colonization and survival.

#### 102 *Infection induces IRE1α activation, but not XBP1*

103 Transcripts induced by *A. phagocytophilum* are associated with the IRE1α signaling axis  
104 (Fig 1A-B), which is the most conserved branch of the UPR among eukaryotes<sup>54</sup>. When  
105 activated, IRE1α autophosphorylates and either splices the mRNA *xbp1* (X-box binding protein  
106 1) or signals through TRAF2<sup>36,37,48,55</sup> (Fig 1A). Unspliced *xbp1* mRNA (*xbp1<sup>U</sup>*) is held in an  
107 inactive state in the cytoplasm by forming a hairpin structure that inhibits translation. The RNase

108 domain of IRE1 $\alpha$  splices an internal intron from *xbp1<sup>U</sup>* allowing it to be translated into a protein  
109 that functions as a transcription factor<sup>48,56–59</sup> (Fig 1A). Alternatively, IRE1 $\alpha$  can recruit the  
110 signaling molecule TRAF2 to produce proinflammatory responses through NF- $\kappa$ B signaling<sup>36–</sup>  
111 <sup>38,55</sup>. We aligned mammalian sequences from the IRE1 $\alpha$  pathway with tick homologs and  
112 observed sequence similarity with BiP, IRE1 $\alpha$ , XBP1, and TRAF2 (Supplemental Figure 1A-D).  
113 Notably, the IRE1 $\alpha$  kinase domain, RNase domain, and the activity-inducing phospho-serine  
114 (Supplemental Figure 1B) were well-conserved with human sequences. Given this sequence  
115 conservation, we used an antibody against human phosphorylated IRE1 $\alpha$  to examine the  
116 posttranslational activation status of IRE1 $\alpha$  in ticks. When treated with UPR inducers  
117 thapsigargin and tunicamycin, increased IRE1 $\alpha$  phosphorylation was observed in ISE6 tick cells  
118 by immunoblot, as expected (Supplemental Figure 2A). *A. phagocytophilum* also induced IRE1 $\alpha$   
119 phosphorylation in ISE6 cells, indicating that infection induces receptor activation (Fig 2A). A  
120 small molecule inhibitor, KIRA6<sup>60</sup>, successfully blocked IRE1 $\alpha$  phosphorylation during infection  
121 (Fig 2A) and this inhibition led to significant increases in *A. phagocytophilum* numbers (Fig 2B).  
122 Similarly, knocking down the expression of *ire1 $\alpha$*  through RNAi also increased *A.*  
123 *phagocytophilum* bacterial burden (Fig 2C). These data show that IRE1 $\alpha$  signaling in ticks is  
124 activated by infection and restricts bacterial colonization *in vitro*.

125 To delineate the signaling events downstream from IRE1 $\alpha$ , *xbp1<sup>U</sup>* was next examined in  
126 infected ISE6 cells. Primers flanking the *xbp1* intron (Supplemental Fig 1E) were used to  
127 differentiate spliced and unspliced transcripts by PCR. Unspliced *xbp1<sup>U</sup>* migrates as a single  
128 459 bp band. In contrast, spliced *xbp1<sup>S</sup>* presents as a trimer on an agarose gel, consisting of  
129 spliced transcripts (*xbp1<sup>S</sup>*, 434 bp), unspliced transcripts (*xbp1<sup>U</sup>*) and an *xbp1<sup>U</sup>-xbp1<sup>S</sup>*  
130 heterodimer that is an artifact of PCR and migrates slightly higher. Spliced *xbp1<sup>S</sup>* was observed  
131 in thapsigargin-treated tick cells under all conditions. In contrast, *A. phagocytophilum* infection  
132 did not induce *xbp1<sup>U</sup>* splicing at any time points *in vitro* (Fig 2D). We next probed *in vivo*

133 samples from replete *I. scapularis* nymphs that were either fed on uninfected mice or those  
134 infected with *A. phagocytophilum* or *B. burgdorferi*. Across all samples, *xbp1<sup>U</sup>* remained  
135 unspliced (Fig 2E). These results indicate that although the tick IRE1 $\alpha$  is activated by infection  
136 and restricts bacterial burden, this phenotype is not carried out through XBP1 activity.

137         Since XBP1 is not responsive to infection, we sought to determine whether IRE1 $\alpha$  is  
138 signaling through *Ixodes* TRAF2. Reducing the expression of *traf2* through RNAi in *Ixodes* ISE6  
139 cells caused a significant increase in *A. phagocytophilum* (Fig 2F), correlating with the  
140 phenotype observed when silencing *ire1 $\alpha$*  transcripts (Fig 2C). These data, together with  
141 upregulated *traf2* expression in *A. phagocytophilum*-infected *I. scapularis* nymphs (Fig 1B),  
142 suggests that IRE1 $\alpha$  is signaling through TRAF2 to restrict pathogen colonization.

#### 143 *IRE1 $\alpha$ interfaces with TRAF2 in I. scapularis ticks*

144         Aligning sequences from humans and ticks reveals that the *Ixodes* TRAF2 is  
145 fundamentally unique when compared to the mammalian homolog (Supplemental Figure 3A).  
146 The *Ixodes* TRAF2 lacks a RING (Really Interesting New Gene) domain that is necessary for  
147 ubiquitin ligase activity<sup>61</sup>. The *Ixodes* TRAF2 also has a reduced TRAF-N domain, which is  
148 responsible for bridging interactions with other proteins<sup>132</sup>. Given these differences, we  
149 performed homology modeling and a “prediction-driven” docking approach<sup>62</sup> with the *I.*  
150 *scapularis* IRE1 $\alpha$  and TRAF2 proteins to gain insight into how they interact. BLAST was used to  
151 identify the human TRAF2 crystal structure<sup>63</sup> (PDB code 1CA9) as a modeling template for  
152 *Ixodes* TRAF2. The modeled form of the *Ixodes* TRAF2 C-terminal region features part of a  
153 coiled-coil domain and the highly conserved TRAF-C domain (Supplemental Fig 3B). In  
154 addition, the homology model is a trimer where the coiled-coil domain is a single alpha helix and  
155 the TRAF-C domain forms an eight-stranded antiparallel  $\beta$ -sandwich. Next, the human IRE1 $\alpha$   
156 crystal structure<sup>64</sup> (PDB code 6URC) was identified by BLAST as a homology template for  
157 modeling the cytosolic RNase/kinase domain of *I. scapularis* IRE1 $\alpha$ . The structure was modeled

158 in the active state quaternary structure proposed to be necessary for autophosphorylation and  
159 RNase activity<sup>65</sup> (Supplemental Figure 3C-D).

160 We then modeled the *Ixodes* IRE1 $\alpha$ -TRAF2 complex using a prediction-driven docking  
161 approach<sup>66</sup>. This tactic combines the utility of interface prediction with *ab initio* docking and is a  
162 useful alternative to *ab initio* docking alone when examining protein-protein complex formation.  
163 CPORT (Consensus Prediction of interface Residues in Transient complexes)<sup>66</sup> was used to  
164 assign active and passive residues at the interface of the trimeric TRAF-C domains and the  
165 RNase/kinase domain of IRE1 $\alpha$  (Fig 3A). Residues were then used to filter the docking process  
166 by HADDOCK 2.2<sup>67</sup>, which optimizes residue conformations at the interface before proceeding  
167 to refinement. The docking model places the trimeric TRAF2 interface at the kinase domain of  
168 IRE1 $\alpha$  with a buried surface area of 3262.16 Å<sup>2</sup> (Fig 3B). Importantly, trimeric TRAF2 is  
169 positioned in a manner that does not interfere with the IRE1 $\alpha$  dimer interface and is away from  
170 the C-terminal transmembrane domain (circled) that anchors IRE1 $\alpha$  to the ER (Fig 3B). Five salt  
171 bridge interactions were identified that define how the TRAF2 trimer is positioned onto the  
172 kinase domain of IRE1 $\alpha$  (Fig 3C). Each chain of TRAF2 participates in salt bridge interactions  
173 with the kinase domain of IRE1 $\alpha$ . Therefore, the oligomeric state of TRAF2 seems to play an  
174 important role in docking specificity with the RNase/kinase domain of IRE1 $\alpha$ . Altogether, *in silico*  
175 docking analyses with *Ixodes* IRE1 $\alpha$  and TRAF2 suggest that these two molecules can directly  
176 interface with one another.

177 To experimentally validate that IRE1 $\alpha$  and TRAF2 specifically interact, we used a  
178 Human Embryonic Kidney (HEK) 293T cell transfection system with plasmids expressing *Ixodes*  
179 IRE1 $\alpha$  and TRAF2 fused to affinity tags (Fig 3D). Recombinant protein expression was  
180 confirmed by immunoblotting transfected cells with antibodies for FLAG and HA tags (IRE1 $\alpha$ -  
181 FLAG and TRAF2-HA). When *Ixodes* IRE1 $\alpha$  and TRAF2 are co-expressed, immunoprecipitating  
182 with antibodies against the FLAG tag demonstrates that IRE1 $\alpha$  specifically pulls down TRAF2



183 and vice versa (Fig 3D). Altogether, these data demonstrate that *Ixodes* IRE1 $\alpha$  and TRAF2  
184 directly and specifically interact.

### 185 *Ixodes IRE1 $\alpha$ and TRAF2 restrict in vivo bacterial colonization in ticks*

186 We next determined whether the pathogen-restricting activity of *Ixodes* IRE1 $\alpha$  and  
187 TRAF2 observed *in vitro* had similar impacts *in vivo*. To knock down gene expression, unfed *I.*  
188 *scapularis* nymphs were microinjected with siRNA targeting *ire1 $\alpha$*  and *traf2* or with a scrambled  
189 control (scRNA). Nymphs were rested overnight and then fed to repletion on *A.*  
190 *phagocytophilum*-infected mice. Gene silencing and bacterial burden were both quantified by  
191 qRT-PCR. Similar to *in vitro* experiments, reducing the expression of *ire1 $\alpha$*  and *traf2* lead to an  
192 increase in *A. phagocytophilum* burdens in *I. scapularis* nymphs (Fig 4A-B).

193 *I. scapularis* take a blood meal once per life stage, with ticks initially becoming infected  
194 during the larval phase<sup>68</sup>. Since gene expression can vary depending on arthropod life stage<sup>69–</sup>  
195 <sup>71</sup>, we examined the impact of IRE1 $\alpha$  and TRAF2 on pathogen colonization in larvae. We  
196 silenced *ire1 $\alpha$*  and *traf2* in *I. scapularis* larvae using a modified immersion protocol where ticks  
197 were submerged in siRNA or scrambled controls overnight<sup>72</sup>. Following immersion, larvae were  
198 rested for 24 hours before feeding to repletion on *A. phagocytophilum*-infected mice. Significant  
199 knockdown of *ire1 $\alpha$*  and *traf2* was observed in siRNA-treated larvae with this method, which  
200 caused an increase in *A. phagocytophilum* numbers (Fig 4C-D).

201 Soon after *A. phagocytophilum* is acquired, the bacteria migrate to the salivary glands  
202 where they persist throughout the tick life cycle<sup>68,73,74</sup>. To understand how IRE1 $\alpha$  influences  
203 bacterial colonization in tick tissue subsets, we employed an *ex vivo* tick organ culture  
204 system<sup>75,76</sup>. Midguts and salivary glands from adult *I. scapularis* ticks were dissected and  
205 treated with the IRE1 $\alpha$  inhibitor KIRA6 prior to infection with *A. phagocytophilum* (Fig 5E).  
206 Similar to *in vitro* and *in vivo* findings, inhibiting the activity of IRE1 $\alpha$  lead to significantly higher

207 *A. phagocytophilum* burdens in *ex vivo* salivary gland and midgut cultures (Fig 4F-G),  
208 demonstrating that this signaling axis functionally restricts bacterial colonization in disparate tick  
209 tissues.

210 We next asked whether the activity of IRE1 $\alpha$ -TRAF2 signaling was restrictive to different  
211 tick-borne microbes, such as the Lyme disease-causing spirochete *B. burgdorferi*. Expression of  
212 *ire1a* and *traf2* was knocked down through RNAi in both *I. scapularis* nymphs and larvae using  
213 the same methods described above and ticks were fed to repletion on *B. burgdorferi*-infected  
214 mice. In agreement with the phenotype observed with *A. phagocytophilum*, significantly higher  
215 *B. burgdorferi* levels were observed in siRNA-treated ticks at both the nymph (Fig. 5A-B) and  
216 larval life stages (Fig 5C-D). These data show that IRE1 $\alpha$ -TRAF2 signaling is broadly  
217 responsive to multiple *I. scapularis*-transmitted pathogens and is functionally restrictive to  
218 microbial colonization during different tick life stages.

#### 219 *The IMD pathway is triggered by IRE1 $\alpha$*

220 TRAF2 is a component of the mammalian TNFR network, which is functionally  
221 analogous to the arthropod IMD pathway. This parallel led us to ask whether the antimicrobial  
222 activity of the *Ixodes* IRE1 $\alpha$ -TRAF2 axis operates through arthropod immunity. AMPs specific to  
223 the IMD pathway have not yet been identified in ticks. Instead, the *Drosophila* S2\* cell line can  
224 be used as a surrogate model to quantify pathway-specific AMPs<sup>28</sup>. To examine whether ER  
225 stress induces an immune response in the absence of microbes, we treated S2\* cells with the  
226 UPR inducer thapsigargin. AMPs corresponding to the IMD pathway (*diptericin*, *attacin A*, and  
227 *cecropin A2*<sup>77</sup>) were significantly induced in a dose-dependent manner compared to  
228 unstimulated controls (Supplemental Figure 4A). In contrast, the Toll pathway AMP *IM1*<sup>77-79</sup> was  
229 not significantly different, demonstrating that ER stress leads to IMD pathway activation  
230 independent of microbial agonists.

231 It is known that the IMD pathway is responsive to tick-transmitted pathogens *A.*  
232 *phagocytophilum* and *B. burgdorferi*<sup>28,30</sup>. Since tick-borne microbes also activate the UPR (Figs  
233 1B and 2A) and ER stress induces the IMD network (Supplemental Figure 4A), we asked  
234 whether blocking IRE1 $\alpha$  during infection would inhibit the IMD pathway. S2\* cells that were  
235 treated with the IRE1 $\alpha$  inhibitor KIRA6 prior to *A. phagocytophilum* or *B. burgdorferi* infection  
236 showed significantly reduced IMD pathway AMPs (Supplemental Figure 4B-C).

237 We next examined whether the tick IMD pathway underwent a similar UPR-driven  
238 activation event. Relish is the transcription factor associated with IMD pathway activation.  
239 Similar to what was observed in *Drosophila* S2\* cells, ISE6 cells that were treated with UPR  
240 stimulators thapsigargin or tunicamycin showed an increase in Relish activation (Fig 6A). We  
241 next asked if inhibiting IRE1 $\alpha$  would block activation of the IMD pathway in ticks. ISE6 cells  
242 were stimulated with *A. phagocytophilum* and *B. burgdorferi* alone or were first pretreated with  
243 the IRE1 $\alpha$  inhibitor, KIRA6, before infection. Pretreatment with KIRA6 resulted in a decline in  
244 Relish activation (Fig 6B-C), indicating that infection-induced IMD pathway activation occurs  
245 through IRE1 $\alpha$ . Collectively, our results provide strong evidence that the IRE1 $\alpha$ -TRAF2 axis  
246 functions as an IMD pathway-activating mechanism.

#### 247 *Ixodes* IRE1 $\alpha$ -TRAF2 signaling potentiates reactive oxygen species

248 A complementary immune mechanism to the IMD pathway is the production of reactive  
249 oxygen species (ROS), which cause bactericidal damage to nucleic acids, proteins, and  
250 membrane lipids<sup>15,80,81</sup>. Because *B. burgdorferi* and *A. phagocytophilum* are both sensitive to  
251 killing by ROS<sup>82-85</sup> and the mammalian UPR can lead to ROS production<sup>86,87</sup>, we investigated  
252 whether ROS can be induced by the *Ixodes* IRE1 $\alpha$ -TRAF2 pathway. ISE6 cells were stimulated  
253 with either thapsigargin, tunicamycin, or a vehicle control and monitored for ROS with the  
254 fluorescent indicator 2',7'-dichlorofluorescein diacetate. Pharmacological inducers caused  
255 significantly higher fluorescence, indicating that the tick UPR potentiates ROS (Fig 6D).

256 Infection with *A. phagocytophilum* and *B. burgdorferi* also elicited ROS production in tick cells  
257 (Fig 6E-F). Pretreating ISE6 cells with the ROS-inhibiting agent DPI (diphenyleneidonium  
258 chloride) prior to infection reduced fluorescence, as expected. Importantly, blocking IRE1 $\alpha$   
259 activity with KIRA6 either reduced or completely mitigated ROS (Fig 6E-F), demonstrating that  
260 infection-induced ROS is potentiated by IRE1 $\alpha$ .

### 261 *IRE1 $\alpha$ -TRAF2 signaling restricts pathogens across tick vectors*

262 Since the UPR is conserved across eukaryotes, we explored the possibility that the  
263 microbe-restricting activity of IRE1 $\alpha$ -TRAF2 signaling could functionally impact other arthropod  
264 vectors. *D. andersoni* ticks are important disease vectors that transmit several pathogens  
265 including the obligate intracellular rickettsia, *A. marginale*<sup>88</sup>. When inducing the UPR in the *D.*  
266 *andersoni* tick cell line DAE100 with tunicamycin and thapsigargin (Fig 7A-B) or blocking IRE1 $\alpha$   
267 with KIRA6 (Fig 7C), we observed significant changes in *A. marginale* invasion and replication,  
268 comparable to what was observed with *I. scapularis* and *A. phagocytophilum* (Figs 1C-D, 2B).  
269 Moreover, higher bacterial loads were also observed in *D. andersoni* *ex vivo* midgut and salivary  
270 gland cultures when IRE1 $\alpha$  activity was blocked with KIRA6 (Fig 7D-F). Altogether, this  
271 demonstrates that the microbe-restricting activity of IRE1 $\alpha$ -TRAF2 signaling is conserved across  
272 tick species and is active against disparate pathogens, including intracellular bacteria (*A.*  
273 *phagocytophilum* and *A. marginale*) and extracellular spirochetes (*B. burgdorferi*).

## 274 **DISCUSSION**

275 How arthropod immunity responds to infection is a fundamental factor influencing the  
276 ability of vectors to harbor and transmit pathogens<sup>2-8</sup>. The IMD pathway is increasingly  
277 recognized as being divergent across species, with classically defined upstream regulators  
278 missing in many arthropod genomes<sup>15-27,32,34,35</sup>. This suggests that an alternative activation  
279 mechanism exists. In this article we demonstrate that the *I. scapularis* IMD pathway is initiated

280 through the IRE1 $\alpha$ -TRAF2 axis of the UPR. Colonization and replication of *A. phagocytophilum*  
281 and *B. burgdorferi* are restricted in ticks by *Ixodes* IRE1 $\alpha$  and TRAF2 both *in vitro* and *in vivo*.  
282 Moreover, we show that IMD pathway activation and ROS production in response to *A.*  
283 *phagocytophilum* and *B. burgdorferi* are dependent on IRE1 $\alpha$  activity and that this mode of  
284 antibacterial restriction is conserved across ticks. Collectively, our findings provide an  
285 explanation for how the core IMD pathway is activated in the absence of canonical upstream  
286 regulators.

287 To our knowledge, this is the first time that cellular stress responses have been  
288 implicated in influencing vector competency. Why host cell stress responses are triggered by *A.*  
289 *phagocytophilum* and *B. burgdorferi* remains unclear. Ticks do not appear to suffer pathological  
290 consequences from the microbes they transmit. The connection between host cell stress and  
291 immune outcomes supports a model where transmissible pathogens would benefit most by  
292 decreasing infection-induced stress. This model is reinforced by the absence of common  
293 inflammatory PAMPs in many tick-transmitted pathogens. For example, all *Ixodes*-transmitted  
294 bacteria lack lipopolysaccharide (LPS) and DAP-PGN<sup>89-92</sup>. *B. burgdorferi* flagella are housed in  
295 the periplasm, effectively shielded from recognition by host cells<sup>93</sup>. During coevolution with ticks,  
296 *Ixodes*-transmitted pathogens may have lost inflammatory PAMPs with the benefit of reducing  
297 cellular stress and host responses, thereby promoting persistence and transmission.  
298 Nevertheless, our data shows that *A. phagocytophilum* and *B. burgdorferi* impart at least some  
299 stress on ticks. Since immune responses are energetically costly to the host<sup>94,95</sup>, we speculate  
300 that the tick response is tuned to match the level of threat imposed by infection, ultimately  
301 striking a balance that conserves resources and preserves tick fitness.

302 Our findings indicate a mechanism of IMD pathway activation that deviates from the  
303 classically defined paradigm where pattern recognition receptors (PRRs) sense bacterial-  
304 derived PAMPs. Both intracellular and extracellular pathogens impart stress on the host, which

305 can be caused by secreted toxic byproducts, competition for nutrients, and/or physical damage  
306 to host cells/organ systems<sup>96</sup>. For example, *B. burgdorferi* is an extracellular spirochete and an  
307 extreme auxotroph that lacks many central metabolic pathways<sup>97,98</sup>. To get around this  
308 limitation, it parasitizes purines<sup>99</sup>, amino acids<sup>100</sup>, cholesterol<sup>101,102</sup>, long-chain fatty acids<sup>103,104</sup>,  
309 carbon sources<sup>105</sup>, and other metabolites<sup>106</sup> from the host. *A. phagocytophilum* is obligately  
310 intracellular and parasitizes amino acids and cholesterol from the host, in addition to  
311 manipulating host cell processes with secreted effectors<sup>107–112</sup>. From this perspective, both  
312 microbes cause stress to the host by competing for a finite amount of resources and disturbing  
313 normal cellular processes. Indeed, our evidence shows that tick-transmitted microbes stimulate  
314 the UPR and are restricted by its activity. Although cellular stress responses detect and  
315 respond to stress, they are not necessarily specific to types of stressors and instead respond by  
316 monitoring macromolecular threats to the cell<sup>40,41,113</sup>. This more generalized signal widens the  
317 infection-sensing scope of possibility and reduces the requirement for an array of specific  
318 immune receptors. In this regard, a wide variety of stimuli would converge on a common  
319 immune outcome. Since the UPR is an evolutionarily conserved mechanism across  
320 eukaryotes<sup>36–38</sup>, it is feasible that UPR-initiated immunity is an ancient mode of pathogen-  
321 sensing and host defense against a broad array of infectious organisms.

322 In summary, we have discovered a linkage between cellular stress responses and  
323 arthropod immunity where the *Ixodes* IRE1 $\alpha$ -TRAF2 signaling axis initiates the IMD pathway  
324 (Supplemental Figure 5). The previous “orphaned” status of the IMD pathway in ticks was a  
325 perception that arose from comparative studies with the insect model organism, *Drosophila*. In  
326 fact, the absence of upstream IMD pathway regulators appears to be a shared trait among  
327 chelicerates and hemimetabolous insects<sup>15–24,26–30,32–34,95</sup>. This revelation underscores the  
328 importance of studying fundamental processes outside of model organisms, which may be  
329 valuable for determining concepts that could be basally applicable across species. Our findings

330 are conceptually important given that the IMD pathway widely impacts vector competence in  
331 many arthropods. With this commonality, one can envision a scenario where a conserved  
332 network across species may be an attractive target for future transmission intervention  
333 strategies.

## 334 **METHODS**

### 335 *Bacteria and animal models*

336 *E. coli* cultures were grown in lysogeny broth (LB) supplemented with ampicillin at 100  
337  $\mu\text{g } \mu\text{l}^{-1}$ . Cultures were grown overnight at 37°C with shaking between 230-250 RPM.

338 *A. phagocytophilum* strain HZ was cultured in HL60 cells with Roswell Park Memorial  
339 Institute (RPMI) 1640 medium supplemented with 10% heat-inactivated fetal bovine serum  
340 (Atlanta Biologicals, S11550) and 1X Glutamax (Gibco, 35050061). Cells were maintained  
341 between  $1 \times 10^5 - 1 \times 10^6 \text{ ml}^{-1}$  at 37°C, 5% CO<sub>2</sub>. *A. phagocytophilum* was enumerated as  
342 previously described<sup>114</sup>. Briefly, the percentage of infected cells is multiplied by the average  
343 number of microcolonies per cell, termed 'morulae' (5), the average bacteria per morulae (19)  
344 and the average amount of bacteria typically recovered from the isolation procedure (50%).  
345 Host cell-free *A. phagocytophilum* was isolated by syringe lysis with a 27 gauge needle as  
346 previously described<sup>3</sup>.

347 *B. burgdorferi* B31 (strain MSK5<sup>115</sup>) was grown in modified Barbour-Stoenner-Kelly  
348 (BSK) II medium supplemented with 6% normal rabbit serum (NRS, Pel-Freez, 31126-5) at  
349 37°C, 5% CO<sub>2</sub><sup>115,116</sup>. Spirochete density and growth phase were monitored by dark field  
350 microscopy. Prior to infection, plasmid profiles of all *B. burgdorferi* cultures were screened by  
351 PCR, as described previously<sup>115</sup>.

352 Uninfected *I. scapularis* ticks were provided by the Biodefense and Emerging Infectious  
353 Diseases (BEI) Research Resources Repository from the National Institute of Allergy and  
354 Infectious Diseases (NIAID) ([www.beiresources.org](http://www.beiresources.org)) at the National Institutes of Health (NIH) or

355 from Oklahoma State University (Stillwater, OK, USA). Ticks were maintained in a 23°C  
356 incubator with 16/8 hours light/dark photoperiods and 95-100% relative humidity. C3H/HeJ mice  
357 were purchased from Jackson Laboratories and C57BL/6 mice were obtained from colonies  
358 maintained at Washington State University. 6-10 week old male mice were used for all  
359 experiments. C57BL/6 mice were infected intraperitoneally with  $1 \times 10^7$  host cell-free *A.*  
360 *phagocytophilum*. C3H/HeJ mice were inoculated intradermally with  $1 \times 10^5$  low passage *B.*  
361 *burgdorferi*. All mice were confirmed for infection status prior to tick placement by collecting 25-  
362 50  $\mu$ l of blood from the lateral saphenous vein of each mouse 7 days post-infection. *A.*  
363 *phagocytophilum* burdens were enumerated by quantitative PCR (16s relative to mouse  $\beta$ -  
364 *actin*<sup>117,118</sup>). *B. burgdorferi*-infected blood was subcultured in BSK-II media and examined for the  
365 presence of spirochetes by dark field microscopy<sup>119,120</sup>. Experiments involving mice were carried  
366 out according to guidelines and protocols approved by the American Association for  
367 Accreditation of Laboratory Animal Care (AAALAC) and by the Office of Campus Veterinarian at  
368 Washington State University (Animal Welfare Assurance A3485-01). The animals were housed  
369 and maintained in an AAALAC-accredited facility at Washington State University in Pullman,  
370 WA. All procedures were approved by the Washington State University Biosafety and Animal  
371 Care and Use Committees.

#### 372 *D. melanogaster* and tick cell cultures

373 *D. melanogaster* S2\* cells were cultured with Schneider's *Drosophila* Medium (Gibco,  
374 21720024) supplemented with 10% heat inactivated FBS (Sigma, SH30070) and 1X Glutamax.  
375 Cell were maintained in T75 culture flasks (Corning, 353136) at 28°C.

376 The *I. scapularis* tick cell line, ISE6, was cultured at 32°C, 1% CO<sub>2</sub> in L15C-300 medium  
377 supplemented with 10% heat inactivated FBS (Sigma, F0926), 10% Tryptose Phosphate Broth  
378 (TPB, BD, B260300) and 0.1% Lipoprotein Bovine Cholesterol (LPBC, MP Biomedicals,  
379 219147680)<sup>121</sup>. The *D. andersoni* tick cell line, DAE100, was maintained at 34°C and cultured in



380 L15B medium supplemented with 5% FBS, 10% TBP, and 1% LPBC as previously  
381 described<sup>122,123</sup>.

### 382 *Polyacrylamide gel electrophoresis and Western blotting*

383 Protein concentrations were quantified using BCA assays per manufacture protocol  
384 (Pierce, 23225). 50 µg of protein per sample were separated on a 4-15% MP TGX precast  
385 cassette (Bio-Rad, 4561083) at 100V for 1 hour 25 minutes before being transferred to a PVDF  
386 membrane. Membranes were blocked with 5% milk in PBS-T (1X phosphate-buffered saline  
387 containing 0.1% Tween-20) for 1-2 hours at room temperature before being incubated at 4°C  
388 overnight with a primary antibody in PBS-T with 5% BSA (Bovine Serum Albumin) or 0.5%-5%  
389 milk. Primary antibodies used for immunoblotting are as follows: α-phospho-IRE1α (Abcam,  
390 ab124945, 1:1000), α-Relish (gift from Joao Pedra; 1:500), α-Actin (Sigma, A2103, 1:1000), α-  
391 HA (Pierce, 26183, 1:1000), and α-FLAG-HRP (Sigma, A8592, 1:500). Secondary antibodies  
392 were applied for 1-2 hours at room temperature and are as follows: Goat α-Rabbit-HRP (Abcam,  
393 ab97051, 1:5000), Donkey α-Rabbit-HRP (Thermo Fisher Scientific, A16023, 1:2000), Rabbit α-  
394 Mouse-HRP (Bio-Rad, STAR13B, 1:2000), and Rec-G-Protein-HRP (Thermo Fisher Scientific,  
395 101223, 1:2000). Blots were visualized with Enhanced Chemiluminescence (ECL) Western  
396 blotting substrate (Thermo Fisher Scientific, 32106). If necessary, blots were stripped with  
397 Western Blot Stripping Buffer (Thermo Fisher Scientific, 21059) for 15-20 minutes at room  
398 temperature with shaking.

### 399 *Plasmid construction*

400 Both *Ixodes* IRE1α and TRAF2 were codon optimized for expression in human cell lines  
401 (GenScript). Primers listed in Supplemental Table 1 were used to amplify full length *I. scapularis*  
402 *ire1α* for cloning into pCMV/hygro-Negative Control Vector (SinoBiological, CV005) with *HindIII*  
403 sites. Full length *I. scapularis traf2* was amplified and cloned into pCMV-HA (New MCS) vector

404 (received as a gift from Christopher A. Walsh; Addgene plasmid #32530) using *XhoI* and  
405 *EcoRV*. All constructs were confirmed by sequencing (Eurofins Genomics).

#### 406 *Maintenance and Transfection of HEK 293T cells*

407 HEK 293T cells were cultured in Dulbecco's Modified Eagle's Medium (DMEM, Sigma,  
408 D6429) supplemented with 10% heat inactivated FBS (Atlanta Biologicals, S11550) and 1X  
409 Glutamax. Cells were maintained in T75 culture flasks (Corning, 353136) at 37°C, 5% CO<sub>2</sub>. For  
410 transfection, 1x10<sup>6</sup> HEK 293T cells were seeded into 6-well plates and allowed to attach  
411 overnight. The following day cells were transfected with 2.5 µg of pCMV-TRAF2-HA and/or  
412 pCMV-IRE1α-FLAG plasmid DNA using 10 µl of Lipofectamine 2,000 (Invitrogen, 11668027) in  
413 Opti-MEM I Reduced Serum Medium (Gibco, 31985062). After 5 hours, media containing the  
414 plasmid-Lipofectamine 2,000 complex was removed and replaced with complete DMEM for 48  
415 hours at 33°C, 5% CO<sub>2</sub>. The transfected cells were lysed with 500 µl of 25 mM Tris-HCl pH 7.4,  
416 150 mM NaCl, 1% NP-40, 1 mM EDTA, 5% glycerol with 1X protease and phosphatase inhibitor  
417 cocktail (Thermo Scientific, 78440) for 15 minutes on ice.

#### 418 *Co-immunoprecipitation assay*

419 *Ixodes* IRE1α-FLAG and TRAF2-HA expression was validated by immunoblotting whole  
420 cell lysates with α-FLAG-HRP (Sigma, A8592, 1:500) and α-HA (Pierce, 26183, 1:1000). After  
421 protein expression was confirmed, cross-linked agarose beads (α-FLAG M2: Sigma, A2220; α-  
422 HA: Pierce, 26181) were washed 2X with TBS (50 mM Tris, 150 mM NaCl, pH 7.5) and  
423 incubated with lysis buffer at 4°C for 1 hour. Approximately 1-2 mg of cell lysate was combined  
424 with 80 µl (packed volume) of cross-linked agarose beads and incubated overnight at 4°C.  
425 Beads were washed 3 times with TBS and protein was eluted by boiling in 50 µl of 4X Laemmli  
426 buffer for 5 minutes. Protein interactions were evaluated by immunoblot as described above.

#### 427 *Template-based homology modeling of Ixodes TRAF2 and the RNase/kinase domain of IRE1α*

428 A BLAST search in the Protein Data Bank (PDB) using the *Ixodes* TRAF2 sequence  
429 returned the candidate template crystal structure of the TRAF-C domain from human TRAF2  
430 (39.64% sequence identity). The human TRAF2 crystal structure (PDB code 1CA9) was used  
431 as a reference for building the homology model of the TRAF-C domain and part of the coiled-  
432 coil domain for *Ixodes* TRAF2 (residues 176-357) in SWISS-MODEL<sup>63,124</sup>. QMEANDisCo was  
433 used to obtain a quality score, which defines how well the homology model aligns to reference  
434 structures in the PDB. Scores closer to 1 indicate that the homology model matches well to  
435 other reference structures<sup>125</sup>. Quality assessment of the TRAF2 homology model in  
436 QMEANDisCo gave a score of 0.69. The GalaxyRefine server was used to then further refine  
437 the *Ixodes* TRAF2 homology model, which increased the quality score in QMEANDisCo to  
438 0.71<sup>126</sup>.

439 A PDB BLAST search for *Ixodes* IRE1 $\alpha$  returned the candidate template crystal structure  
440 of the RNase/kinase domain from human IRE1 $\alpha$  (62.20% sequence identity). A homology model  
441 for the cytosolic RNase/kinase domain of tick IRE1 $\alpha$  (residues 525-944) was built using the  
442 crystal structure of the RNase/kinase domain from humans (PDB code 6URC) with SWISS-  
443 MODEL<sup>64,124</sup>. Quality assessment of the tick IRE1 $\alpha$  homology model in QMEANDisCo gave a  
444 score of 0.78.

#### 445 *Prediction-driven docking of Ixodes TRAF2 and the RNase/kinase domain of IRE1 $\alpha$*

446 A consensus interface predictor, CPORT (Consensus Prediction of interface Residues in  
447 Transient complexes), was used to assign residues at the interface of *Ixodes* TRAF2 and the  
448 IRE1 $\alpha$  RNase/kinase domain<sup>66</sup>. Predicted residues were used to define the docking interface  
449 between *Ixodes* TRAF2 and IRE1 $\alpha$  for docking in HADDOCK2.2<sup>67</sup>. The docked model was  
450 immersed in a solvent shell using the TIP3P water model and a short 300K MD simulation was  
451 ran to optimize side chains and improve interaction energetics<sup>67</sup>. The cluster with the lowest Z-  
452 score was chosen for further analysis. Docking models were then screened based on salt bridge

453 interactions at the docking interface and the model with the best chemical complementarity was  
454 used in the final analysis. PyMOL version 2.2.3 was used for all distance measurements of salt-  
455 bridge interactions (<4 Å cutoff) (The PyMOL Molecular Graphics System, Schrodinger, LLC).

#### 456 *ROS assay*

457 ISE6 cells were seeded at a density of  $1.68 \times 10^5$  cells per well in a black-walled, clear-  
458 bottom 96-well plate (Thermo Scientific, 165305) with L15C-300 media. The cells were  
459 maintained in growth conditions described above for the length of experiments. All wells were  
460 treated for 1 hour with 10  $\mu$ M 2',7'-dichlorofluorescein diacetate (DCF-DA, Sigma, D6883) in  
461 Ringer buffer (155 mM NaCl, 5 mM KCl, 1 mM  $MgCl_2 \cdot 6H_2O$ , 2 mM  $NaH_2PO_4 \cdot H_2O$ , 10 mM  
462 HEPES, and 10 mM glucose)<sup>127</sup> alone or with 5  $\mu$ M diphenyleneidonium chloride (DPI, Sigma,  
463 D2926), 1  $\mu$ M KIRA6 (Cayman Chemical, 19151), or 0.1% DMSO. Buffer was removed; cells  
464 were washed with room temperature 1X PBS and incubated for 72 hours in L15C-300 alone or  
465 with *A. phagocytophilum* (MOI 200), *B. burgdorferi* (MOI 200), 10 nM thapsigargin (TG, Sigma,  
466 T9033), or 50 nM tunicamycin (Tu, Sigma T7765). Fluorescence was measured at 504 nm  
467 (excitation), 529 nm (emission). Data is graphed as fold change of relative fluorescence units  
468 (RFU) normalized to the negative control  $\pm$  standard errors of the means (SEM).

#### 469 *Pharmacological treatments, RNAi silencing, quantitative reverse transcriptase-PCR*

470 ISE6 cells were seeded at  $1 \times 10^6$  cells per well and DAE100 cells were seeded at  $5 \times 10^5$   
471 cells per well in a 24-well plate and pre-treated with KIRA6, thapsigargin, or tunicamycin for  
472 indicated times and concentrations prior to infection. Cells were infected with *A.*  
473 *phagocytophilum* (ISE6) or *A. marginale* (DAE100) at an MOI 50 for 18 hours before collection  
474 in Trizol (Invitrogen, 15596026). For DAE100 experiments, all incubations occurred at 34°C in a  
475 BD campy bag with no gaspak. RNA was extracted using the Direct-zol RNA microprep Kit  
476 (Zymo, R2062). cDNA was synthesized from 300-500 ng total RNA with the Verso cDNA

477 Synthesis Kit (Thermo Fisher Scientific, AB1453B). Bacterial burden and gene silencing were  
478 assessed by quantitative reverse transcription-PCR (qRT-PCR) with the iTaq Universal SYBR  
479 Green Supermix (Bio-Rad, 1725125) using primers listed in Supplemental Table 1. Cycle  
480 conditions are as recommended by the manufacturer.

481 For transfection experiments, siRNAs and scrambled controls (scRNAs) were  
482 synthesized following directions from the Silencer siRNA Construction Kit (Invitrogen, AM1620)  
483 using the primers listed in Supplemental Table 1. siRNA or scRNA (3 µg) was used to transfect  
484  $1 \times 10^6$  ISE6 cells overnight with 2.5 µl of Lipofectamine 2,000. Cells were infected with *A.*  
485 *phagocytophilum* (MOI 50) for 18 hours before being collected in Trizol. RNA was isolated and  
486 transcripts were quantified by qRT-PCR as described above. All data are expressed as means  $\pm$   
487 SEM.

#### 488 *Ex vivo I. scapularis and D. andersoni organ culture*

489 Ten male and female unfed adult *I. scapularis* ticks were surface sterilized with  
490 continuous agitation in 10% benzalkonium chloride (Sigma, 12060) for 10 minutes, washed  
491 twice with sterile water, dried on sterile filter paper under aseptic conditions, and transferred to a  
492 sterile tube. Midgut and salivary glands were excised on a microscope slide in a pool of sterile  
493 1X PBS with 100 I.U ml<sup>-1</sup> penicillin and 100 µg ml<sup>-1</sup> streptomycin (Gibco, 15140122). Tissues  
494 were placed in individual wells of a 96-well plate (Costar, 3595) with 100 µl of L15C-300 and  
495 incubated at 32°C with 1% CO<sub>2</sub>. Tissues were treated with 1 µM of KIRA6 or 1% DMSO for 1  
496 hour before the addition of  $1 \times 10^6$  *A. phagocytophilum*. 24 hours post-infection, samples were  
497 collected following the addition of 100 µl of Trizol. Tissues were homogenized using  
498 QIAshredder columns (Qiagen, 79654) according to the manufacturer's instructions prior to  
499 RNA extraction and qRT-PCR analysis, performed as previously described.

500 Twenty male unfed adult *D. andersoni* ticks were surface sterilized and dissected as  
501 above. Tissues were placed in individual wells of a 96-well plate with 100  $\mu$ l of L15B. Tissues  
502 were pretreated with KIRA6 or vehicle control (DMSO) as previously stated prior to the addition  
503 of  $1 \times 10^6$  *A. marginale* for 22 hours. Samples were collected and processed as above with qRT-  
504 PCR standard curves using primers listed in Supplemental Table 1. All data are expressed as  
505 means  $\pm$  SEM

#### 506 *RNAi silencing in nymphs and larvae*

507 *I. scapularis* nymphs were microinjected as described previously<sup>114,121</sup>. 10  $\mu$ l Drummond  
508 microdispensers (DrummondSci, 3000203G/X) were drawn to fine point needles using a  
509 Narishige PC-100 micropipette puller. *I. scapularis* nymphs were microinjected with 25 nl of  
510 siRNA or scRNA (~1000 ng/ $\mu$ l) into the anal pore using a Drummond Nanoject III Nanoliter  
511 Injector (DrummondSci, 3000207). Ticks were allowed to rest overnight before being placed  
512 between the ears and on the back of an infected mouse. Each group was placed on a single  
513 mouse and fed to repletion (5-7 days). Nymphs were flash frozen with liquid nitrogen,  
514 individually crushed with a plastic pestle and suspended in Trizol for RNA extraction.

515 *I. scapularis* larvae were pre-chilled at 4°C for 5 minutes. Approximately 150 larvae were  
516 transferred to a 1.5 ml tube with 40-50  $\mu$ l of either siRNA or scRNA (~1000 ng/ $\mu$ l). The tubes  
517 were centrifuged at 3000 x g for 5 minutes to encourage submersion of the larvae in the dsRNA  
518 and were then incubated overnight at 15°C. The following day, ticks were dried and rested  
519 overnight before being placed on mice to feed until repletion (3-7 days). Larvae were flash  
520 frozen in liquid nitrogen and individually crushed with a plastic pestle. Trizol was added before  
521 proceeding to RNA isolation and qRT-PCR analysis, performed as previously stated.

#### 522 *xbp1* PCR and agarose gel electrophoresis

523 RNA was isolated from both ISE6 cells or replete *I. scapularis* nymphs (uninfected, *A.*  
524 *phagocytophilum*-infected, or *B. burgdorferi*-infected). ISE6 cells were treated with either 0.5  $\mu$ M  
525 thapsigargin or *A. phagocytophilum* at an MOI of 50. Cells were collected 1, 3, 8, and 24 hours  
526 post-treatment in Trizol. RNA was isolated and cDNA synthesized as previously described. The  
527 cleavage status of *xbp1* was assessed via PCR using DreamTaq Green PCR Mastermix  
528 (Thermo Scientific, K1082) and the *xbp1* primers listed in Supplemental Table 1 with the cycling  
529 protocol recommended by the manufacturer. Samples were analyzed using a 3% agarose  
530 (Thermo Fisher, BP160) gel in 1X Tris-Borate EDTA (TBE, Thermo Fisher, BP1333) with 0.5  $\mu$ g  
531 ml<sup>-1</sup> of ethidium bromide (Thermo Fisher, BP102) and imaged with a Protein Simple  
532 Alphamager HP system.

### 533 *UPR and IMD Gene Expression Profiling*

534 Untreated *I. scapularis* nymphs were fed to repletion on *A. phagocytophilum*-infected  
535 mice or uninfected mice and frozen. The expression levels of UPR genes were assessed in  
536 individual ticks by qRT-PCR as previously described. Primers specific for *bip*, *ire1 $\alpha$* , *xbp1*, and  
537 *traf2* are listed in Supplemental Table 1. Data are expressed as means  $\pm$  SEM.

538  $1 \times 10^6$  *D. melanogaster* S2\* cells were seeded in Schneider's media with 1  $\mu$ M of 20-  
539 hydroxyecdysone to prime the IMD pathway, as previous reported<sup>128</sup>. Cells were treated with  
540 indicated concentrations of thapsigargin for 6 hours or with 10  $\mu$ M of KIRA6 for 1 hour prior to  
541 infection with *A. phagocytophilum* (MOI 50) or *B. burgdorferi* (MOI 50) for 6 hours. Samples  
542 were collected in Trizol and RNA was isolated. IMD pathway and Toll pathway-specific AMPs  
543 were quantified by qRT-PCR with primers listed in Supplemental Table 1 as previously  
544 described.

### 545 *Gene alignment*

546 UPR gene sequences were identified by querying the *I. scapularis* genome with *Homo*  
547 *sapiens* protein sequences using NCBI (National Center for Biotechnology Information) protein  
548 BLAST. Human sequences include BiP (NP\_005338.1), IRE1 $\alpha$  (NP\_001424.3), TRAF2  
549 (NP\_066961.2), and XBP1 (NP\_005071.2). Human and tick sequences were aligned using Jal  
550 view<sup>129</sup>. Shaded regions indicate amino acid physiochemical property conservation. EMBL-EBI  
551 (European Bioinformatics Institute) Pfam 34.0 was used to identify and annotate protein  
552 domains<sup>130</sup>.

### 553 *Statistical analysis*

554 *In vitro* experiments were performed with 3-5 replicates. *In vivo* experiments involved the  
555 use of 10-20 ticks. Data were expressed as means  $\pm$  SEM and analyzed with either unpaired  
556 Student's t-test or Welch's t-test. Calculations and graphs were created with GraphPad Prism  
557 version 9.0. P < 0.05 was considered statistically significant.

558



559 REFERENCES

- 560 1. WHO | Vector-borne diseases. WHO <http://www.who.int/mediacentre/factsheets/fs387/en/>.
- 561 2. Hillyer, J. F., Schmidt, S. L. & Christensen, B. M. Hemocyte-mediated phagocytosis and  
562 melanization in the mosquito *Armigeres subalbatus* following immune challenge by  
563 bacteria. *Cell Tissue Res.* **313**, 117–127 (2003).
- 564 3. Garver, L. S., Dong, Y. & Dimopoulos, G. Caspar controls resistance to *Plasmodium*  
565 *falciparum* in diverse *Anopheline* species. *PLOS Pathog* **5**, e1000335 (2009).
- 566 4. Blumberg, B. J., Trop, S., Das, S. & Dimopoulos, G. Bacteria- and IMD pathway-  
567 independent immune defenses against *Plasmodium falciparum* in *Anopheles gambiae*.  
568 *PLoS One* **8**, e72130 (2013).
- 569 5. Oliva Chávez, A. S., Shaw, D. K., Munderloh, U. G. & Pedra, J. H. F. Tick Humoral  
570 Responses: Marching to the beat of a different drummer. *Front. Microbiol.* **8**, (2017).
- 571 6. De la Fuente, J. *et al.* Tick-Pathogen interactions and vector competence: Identification of  
572 molecular drivers for tick-borne diseases. *Front. Cell. Infect. Microbiol.* **7**, (2017).
- 573 7. Lane, R. S. Competence of ticks as vectors of microbial agents with an emphasis on  
574 *Borrelia burgdorferi*. In Sonenshine DE, Mather TN, editors. in *Ecological dynamics of tick-*  
575 *borne zoonoses*. 45–67 (Oxford University Press, 1994).
- 576 8. Goddard, J. *Infectious Diseases and Arthropods*. (Humana Press, 2000).
- 577 9. Buchon, N., Silverman, N. & Cherry, S. Immunity in *Drosophila melanogaster*--from  
578 microbial recognition to whole-organism physiology. *Nat. Rev. Immunol.* **14**, 796–810  
579 (2014).
- 580 10. Kleino, A. & Silverman, N. The *Drosophila* IMD pathway in the activation of the humoral  
581 immune response. *Dev. Comp. Immunol.* **42**, 25–35 (2014).
- 582 11. Kaneko, T. *et al.* PGRP-LC and PGRP-LE have essential yet distinct functions in the  
583 drosophila immune response to monomeric DAP-type peptidoglycan. *Nat. Immunol.* **7**,  
584 715–723 (2006).
- 585 12. Naitza, S. *et al.* The *Drosophila* immune defense against gram-negative infection requires  
586 the death protein *dFADD*. *Immunity* **17**, 575–581 (2002).
- 587 13. Meinander, A. *et al.* Ubiquitylation of the initiator caspase *DREDD* is required for innate  
588 immune signalling. *EMBO J.* **31**, 2770–2783 (2012).
- 589 14. Paquette, N. *et al.* Caspase-mediated cleavage, *IAP* binding, and ubiquitination: linking  
590 three mechanisms crucial for *Drosophila NF-kappaB* signaling. *Mol. Cell* **37**, 172–182  
591 (2010).
- 592 15. Palmer, W. J. & Jiggins, F. M. Comparative genomics reveals the origins and diversity of  
593 arthropod immune systems. *Mol. Biol. Evol.* **32**, 2111–2129 (2015).
- 594 16. Arp, A. P., Hunter, W. B. & Pelz-Stelinski, K. S. Annotation of the Asian citrus psyllid  
595 genome reveals a reduced innate immune system. *Front. Physiol.* **0**, (2016).
- 596 17. Saha, S. *et al.* Improved annotation of the insect vector of citrus greening disease:  
597 biocuration by a diverse genomics community. *Database J. Biol. Databases Curation* **2017**,  
598 bax032 (2017).
- 599 18. Shelby, K. S. Functional immunomics of the squash bug, *Anasa tristis* (De Geer)  
600 (Heteroptera: Coreidae). *Insects* **4**, 712–730 (2013).
- 601 19. Zhang, C.-R. *et al.* The immune strategy and stress response of the mediterranean  
602 species of the *Bemisia tabaci* Complex to an orally delivered bacterial pathogen. *PLOS*  
603 *ONE* **9**, e94477 (2014).
- 604 20. Chen, W. *et al.* The draft genome of whitefly *Bemisia tabaci* MEAM1, a global crop pest,  
605 provides novel insights into virus transmission, host adaptation, and insecticide resistance.  
606 *BMC Biol.* **14**, 110 (2016).
- 607 21. Kim, J. H. *et al.* Comparison of the humoral and cellular immune responses between body  
608 and head lice following bacterial challenge. *Insect Biochem. Mol. Biol.* **41**, 332–339 (2011).

- 609 22. Elsik, C. G. The pea aphid genome sequence brings theories of insect defense into  
610 question. *Genome Biol.* **11**, 106 (2010).
- 611 23. Benoit, J. B. *et al.* Unique features of a global human ectoparasite identified through  
612 sequencing of the bed bug genome. *Nat. Commun.* **7**, 10165 (2016).
- 613 24. Kirkness, E. F. *et al.* Genome sequences of the human body louse and its primary  
614 endosymbiont provide insights into the permanent parasitic lifestyle. *Proc. Natl. Acad. Sci.*  
615 **107**, 12168–12173 (2010).
- 616 25. Bechsgaard, J. *et al.* Comparative genomic study of arachnid immune systems indicates  
617 loss of *beta-1,3-glucanase-related* proteins and the immune deficiency pathway. *J. Evol.*  
618 *Biol.* **29**, 277–291 (2016).
- 619 26. Capelli-Peixoto, J. *et al.* The transcription factor *Relish* controls *Anaplasma marginale*  
620 infection in the bovine tick *Rhipicephalus microplus*. *Dev. Comp. Immunol.* **74**, 32–39  
621 (2017).
- 622 27. Gulia-Nuss, M. *et al.* Genomic insights into the *Ixodes scapularis* tick vector of Lyme  
623 disease. *Nat. Commun.* **7**, 10507 (2016).
- 624 28. Shaw, D. K. *et al.* Infection-derived lipids elicit an immune deficiency circuit in arthropods.  
625 *Nat. Commun.* **8**, ncomms14401 (2017).
- 626 29. Rosa, R. D. *et al.* Exploring the immune signalling pathway-related genes of the cattle tick  
627 *Rhipicephalus microplus*: From molecular characterization to transcriptional profile upon  
628 microbial challenge. *Dev. Comp. Immunol.* **59**, 1–14 (2016).
- 629 30. Carroll, E. E. M. *et al.* *p47* licenses activation of the immune deficiency pathway in the tick  
630 *Ixodes scapularis*. *Proc. Natl. Acad. Sci.* **116**, 205–210 (2019).
- 631 31. Severo, M. S. *et al.* The E3 ubiquitin ligase *XIAP* restricts *Anaplasma phagocytophilum*  
632 colonization of *Ixodes scapularis* ticks. *J. Infect. Dis.* **208**, 1830–1840 (2013).
- 633 32. Mesquita, R. D. *et al.* Genome of *Rhodnius prolixus*, an insect vector of Chagas disease,  
634 reveals unique adaptations to hematophagy and parasite infection. *Proc. Natl. Acad. Sci.*  
635 *U. S. A.* **112**, 14936–14941 (2015).
- 636 33. Salcedo-Porras, N., Guarneri, A., Oliveira, P. L. & Lowenberger, C. *Rhodnius prolixus*:  
637 Identification of missing components of the IMD immune signaling pathway and functional  
638 characterization of its role in eliminating bacteria. *PLoS ONE* **14**, e0214794 (2019).
- 639 34. Zumaya-Estrada, F. A., Martínez-Barnette, J., Lavore, A., Rivera-Pomar, R. & Rodríguez,  
640 M. H. Comparative genomics analysis of triatomines reveals common first line and  
641 inducible immunity-related genes and the absence of *Imd* canonical components among  
642 hemimetabolous arthropods. *Parasit. Vectors* **11**, 48 (2018).
- 643 35. Rolandelli, A., Nascimento, A. E. C., Silva, L. S., Rivera-Pomar, R. & Guarneri, A. A.  
644 Modulation of IMD, Toll, and Jak/STAT immune pathways genes in the fat body of  
645 *Rhodnius prolixus* during *Trypanosoma rangeli* infection. *Front. Cell. Infect. Microbiol.* **0**,  
646 (2021).
- 647 36. Grootjans, J., Kaser, A., Kaufman, R. J. & Blumberg, R. S. The unfolded protein response  
648 in immunity and inflammation. *Nat. Rev. Immunol.* **16**, 469–484 (2016).
- 649 37. Hetz, C. The unfolded protein response: controlling cell fate decisions under ER stress and  
650 beyond. *Nat. Rev. Mol. Cell Biol.* **13**, 89–102 (2012).
- 651 38. Schröder, M. & Kaufman, R. J. The mammalian unfolded protein response. *Annu. Rev.*  
652 *Biochem.* **74**, 739–789 (2005).
- 653 39. Zhou, Y. *et al.* Porcine reproductive and respiratory syndrome virus infection induces  
654 stress granule formation depending on protein kinase r-like endoplasmic reticulum kinase  
655 (*PERK*) in MARC-145 Cells. *Front. Cell. Infect. Microbiol.* **7**, (2017).
- 656 40. Kültz, D. Evolution of the cellular stress proteome: from monophyletic origin to ubiquitous  
657 function. *J. Exp. Biol.* **206**, 3119–3124 (2003).
- 658 41. Kültz, D. Molecular and evolutionary basis of the cellular stress response. *Annu. Rev.*  
659 *Physiol.* **67**, 225–257 (2004).

- 660 42. Celli, J. & Tsolis, R. M. Bacteria, the endoplasmic reticulum and the unfolded protein  
661 response: friends or foes? *Nat. Rev. Microbiol.* **13**, 71–82 (2015).
- 662 43. Keestra-Gounder, A. M. *et al.* *NOD1* and *NOD2* signalling links ER stress with  
663 inflammation. *Nature* **532**, 394–397 (2016).
- 664 44. Byndloss, M. X., Keestra-Gounder, A. M., Bäumlér, A. J. & Tsolis, R. M. *NOD1* and *NOD2*:  
665 New functions linking endoplasmic reticulum stress and inflammation. *DNA Cell Biol.* **35**,  
666 311–313 (2016).
- 667 45. Rosche, K. L., Sidak-Loftis, L. C., Hurtado, J., Fisk, E. A. & Shaw, D. K. Arthropods under  
668 pressure: Stress responses and immunity at the pathogen-vector interface. *Front.*  
669 *Immunol.* **11**, (2021).
- 670 46. Pincus, D. *et al.* BiP binding to the ER-stress sensor Ire1 tunes the homeostatic behavior  
671 of the unfolded protein response. *PLoS Biol.* **8**, e1000415 (2010).
- 672 47. Bertolotti, A., Zhang, Y., Hendershot, L. M., Harding, H. P. & Ron, D. Dynamic interaction  
673 of BiP and ER stress transducers in the unfolded-protein response. *Nat. Cell Biol.* **2**, 326–  
674 332 (2000).
- 675 48. Adams, C. J., Kopp, M. C., Larburu, N., Nowak, P. R. & Ali, M. M. U. Structure and  
676 molecular mechanism of ER stress signaling by the unfolded protein response signal  
677 activator IRE1. *Front. Mol. Biosci.* **6**, (2019).
- 678 49. Janssens, S., Pulendran, B. & Lambrecht, B. N. Emerging functions of the unfolded protein  
679 response in immunity. *Nat. Immunol.* **15**, 910–919 (2014).
- 680 50. Wu, H., Ng, B. S. H. & Thibault, G. Endoplasmic reticulum stress response in yeast and  
681 humans. *Biosci. Rep.* **34**, (2014).
- 682 51. Osowski, C. M. & Urano, F. Measuring ER stress and the unfolded protein response using  
683 mammalian tissue culture system. *Methods Enzymol.* **490**, 71–92 (2011).
- 684 52. Thastrup, O., Cullen, P. J., Drobak, B. K., Hanley, M. R. & Dawson, A. P. Thapsigargin, a  
685 tumor promoter, discharges intracellular Ca<sup>2+</sup> stores by specific inhibition of the  
686 endoplasmic reticulum Ca<sup>2+</sup>(+)-ATPase. *Proc. Natl. Acad. Sci.* **87**, 2466–2470 (1990).
- 687 53. Wu, J. *et al.* Tunicamycin specifically aggravates ER stress and overcomes  
688 chemoresistance in multidrug-resistant gastric cancer cells by inhibiting N-glycosylation. *J.*  
689 *Exp. Clin. Cancer Res.* **37**, 272 (2018).
- 690 54. Zhang, L., Zhang, C. & Wang, A. Divergence and conservation of the major UPR branch  
691 IRE1-bZIP signaling pathway across eukaryotes. *Sci. Rep.* **6**, (2016).
- 692 55. Hu, P., Han, Z., Couvillon, A. D., Kaufman, R. J. & Exton, J. H. Autocrine tumor necrosis  
693 factor alpha links endoplasmic reticulum stress to the membrane death receptor pathway  
694 through IRE1alpha-mediated NF-kappaB activation and down-regulation of TRAF2  
695 expression. *Mol. Cell. Biol.* **26**, 3071–3084 (2006).
- 696 56. Back, S. H., Lee, K., Vink, E. & Kaufman, R. J. Cytoplasmic *IRE1α*-mediated *XBP1* mRNA  
697 splicing in the absence of nuclear processing and endoplasmic reticulum stress\*. *J. Biol.*  
698 *Chem.* **281**, 18691–18706 (2006).
- 699 57. Calton, M. *et al.* IRE1 couples endoplasmic reticulum load to secretory capacity by  
700 processing the XBP-1 mRNA. *Nature* **415**, 92–96 (2002).
- 701 58. Shen, X. *et al.* Complementary signaling pathways regulate the unfolded protein response  
702 and are required for *C. elegans* development. *Cell* **107**, 893–903 (2001).
- 703 59. Yoshida, H., Matsui, T., Yamamoto, A., Okada, T. & Mori, K. *XBP1* mRNA is induced by  
704 ATF6 and spliced by IRE1 in response to ER stress to produce a highly active transcription  
705 factor. *Cell* **107**, 881–891 (2001).
- 706 60. Ghosh, R. *et al.* Allosteric inhibition of the IRE1α RNase preserves cell viability and  
707 function during endoplasmic reticulum stress. *Cell* **158**, 534–548 (2014).
- 708 61. Park, H. H. Structure of TRAF Family: Current understanding of receptor recognition.  
709 *Front. Immunol.* **9**, 1999 (2018).

- 710 62. de Vries, S. J. & Bonvin, A. M. J. J. CPORT: a consensus interface predictor and its  
711 performance in prediction-driven docking with HADDOCK. *PLoS One* **6**, e17695 (2011).
- 712 63. Park, Y. C., Burkitt, V., Villa, A. R., Tong, L. & Wu, H. Structural basis for self-association  
713 and receptor recognition of human TRAF2. *Nature* **398**, 533–538 (1999).
- 714 64. Harnoss, J. M. *et al.* Disruption of IRE1 $\alpha$  through its kinase domain attenuates multiple  
715 myeloma. *Proc. Natl. Acad. Sci.* **116**, 16420–16429 (2019).
- 716 65. Mm, A. *et al.* Structure of the Ire1 autophosphorylation complex and implications for the  
717 unfolded protein response. *EMBO J.* **30**, 894–905 (2011).
- 718 66. Vries, S. J. de & Bonvin, A. M. J. J. CPORT: A consensus interface predictor and its  
719 performance in prediction-driven docking with HADDOCK. *PLoS One* **6**, e17695 (2011).
- 720 67. van Zundert, G. C. P. *et al.* The HADDOCK2.2 Web server: user-friendly integrative  
721 modeling of biomolecular complexes. *J. Mol. Biol.* **428**, 720–725 (2016).
- 722 68. Hodzic, E. *et al.* Acquisition and transmission of the agent of Human Granulocytic  
723 Ehrlichiosis by *Ixodes scapularis* Ticks. *J. Clin. Microbiol.* **36**, 3574–3578 (1998).
- 724 69. Fellous, S. & Lazzaro, B. P. Potential for evolutionary coupling and decoupling of larval  
725 and adult immune gene expression. *Mol. Ecol.* **20**, 1558–1567 (2011).
- 726 70. League, G. P., Estévez-Lao, T. Y., Yan, Y., Garcia-Lopez, V. A. & Hillyer, J. F. *Anopheles*  
727 *gambiae* larvae mount stronger immune responses against bacterial infection than adults:  
728 evidence of adaptive decoupling in mosquitoes. *Parasit. Vectors* **10**, 367 (2017).
- 729 71. Critchlow, J. T., Norris, A. & Tate, A. T. The legacy of larval infection on immunological  
730 dynamics over metamorphosis. *Philos. Trans. R. Soc. B Biol. Sci.* **374**, (2019).
- 731 72. Galay, R. L. *et al.* Induction of gene silencing in *Haemaphysalis longicornis* ticks through  
732 immersion in double-stranded RNA. *Ticks Tick-Borne Dis.* **7**, 813–816 (2016).
- 733 73. Liu, L. *et al.* *Ixodes scapularis* salivary gland protein P11 facilitates migration of *Anaplasma*  
734 *phagocytophilum* from the tick gut to salivary glands. *EMBO Rep.* **12**, 1196–1203 (2011).
- 735 74. Hodzic, E. *et al.* Granulocytic ehrlichiosis in the laboratory mouse. *J. Infect. Dis.* **177**, 737–  
736 745 (1998).
- 737 75. Grabowski, J. M. *et al.* Dissecting flavivirus biology in salivary gland cultures from fed and  
738 unfed *Ixodes scapularis* (Black-Legged Tick). *mBio* **10**, (2019).
- 739 76. Grabowski, J. M., Offerdahl, D. K. & Bloom, M. E. The use of *ex vivo* organ cultures in tick-  
740 borne virus research. *ACS Infect. Dis.* **4**, 247–256 (2018).
- 741 77. Lemaitre, B. & Hoffmann, J. The host defense of *Drosophila melanogaster*. *Annu. Rev.*  
742 *Immunol.* **25**, 697–743 (2007).
- 743 78. Fullaondo, A. *et al.* Spn1 Regulates the GGBP3-dependent Toll signaling pathway in  
744 *Drosophila melanogaster*. *Mol. Cell. Biol.* (2011).
- 745 79. Atilano, M. L., Glittenberg, M., Monteiro, A., Copley, R. R. & Ligoxygakis, P. MicroRNAs  
746 that contribute to coordinating the immune response in *Drosophila melanogaster*. *Genetics*  
747 **207**, 163–178 (2017).
- 748 80. Ha, E.-M. *et al.* Coordination of multiple dual oxidase–regulatory pathways in responses to  
749 commensal and infectious microbes in drosophila gut. *Nat. Immunol.* **10**, 949–957 (2009).
- 750 81. Chakrabarti, S., Poidevin, M. & Lemaitre, B. The *Drosophila* MAPK p38c regulates  
751 oxidative stress and lipid homeostasis in the intestine. *PLOS Genet.* **10**, e1004659 (2014).
- 752 82. Lin, M. & Rikihisa, Y. Degradation of p22phox and inhibition of superoxide generation by  
753 *Ehrlichia chaffeensis* in human monocytes. *Cell. Microbiol.* **9**, 861–874 (2007).
- 754 83. Boylan, J. A. & Gherardini, F. C. Determining the cellular targets of reactive oxygen  
755 species in *Borrelia burgdorferi*. *Methods Mol. Biol. Clifton NJ* **431**, 213–221 (2008).
- 756 84. Hyde, J. A., Shaw, D. K., Smith Iii, R., Trzeciakowski, J. P. & Skare, J. T. The BosR  
757 regulatory protein of *Borrelia burgdorferi* interfaces with the RpoS regulatory pathway and  
758 modulates both the oxidative stress response and pathogenic properties of the Lyme  
759 disease spirochete. *Mol. Microbiol.* **74**, 1344–1355 (2009).

- 760 85. Hyde, J. A., Shaw, D. K., Smith, R., Trzeciakowski, J. P. & Skare, J. T. Characterization of  
761 a conditional *bosR* mutant in *Borrelia burgdorferi*. *Infect Immun* **78**, 265–274 (2010).
- 762 86. Abuaita, B. H., Burkholder, K. M., Boles, B. R. & O’Riordan, M. X. The endoplasmic  
763 reticulum stress sensor inositol-requiring enzyme 1 $\alpha$  augments bacterial killing through  
764 sustained oxidant production. *mBio* **6**, (2015).
- 765 87. Abuaita, B. H., Schultz, T. L. & O’Riordan, M. X. Mitochondria-derived vesicles deliver  
766 antimicrobial reactive oxygen species to control phagosome-localized *Staphylococcus*  
767 *aureus*. *Cell Host Microbe* **24**, 625–636.e5 (2018).
- 768 88. Okafor, C. C. *et al.* Factors associated with seroprevalence of *Anaplasma marginale* in  
769 Kentucky cattle. *Vet. Parasitol. Reg. Stud. Rep.* **13**, 212–219 (2018).
- 770 89. Dunning Hotopp, J. C. *et al.* Comparative genomics of emerging human ehrlichiosis  
771 agents. *PLoS Genet.* **2**, e21 (2006).
- 772 90. Beck, G., Benach, J. L. & Habicht, G. S. Isolation, preliminary chemical characterization,  
773 and biological activity of *Borrelia burgdorferi* peptidoglycan. *Biochem. Biophys. Res.*  
774 *Commun.* **167**, 89–95 (1990).
- 775 91. Rikihisa, Y. *Anaplasma phagocytophilum* and *Ehrlichia chaffeensis*: subversive  
776 manipulators of host cells. *Nat. Rev. Microbiol.* **8**, 328–339 (2010).
- 777 92. Takayama, K., Rothenberg, R. J. & Barbour, A. G. Absence of lipopolysaccharide in the  
778 Lyme disease spirochete, *Borrelia burgdorferi*. *Infect. Immun.* **55**, 2311–2313 (1987).
- 779 93. Holt, S. C. Anatomy and chemistry of spirochetes. *Microbiol. Rev.* **42**, 114–160 (1978).
- 780 94. Moret, Y. Survival for immunity: The price of immune system activation for bumblebee  
781 workers. *Science* **290**, 1166–1168 (2000).
- 782 95. Shaw, D. K. *et al.* Vector immunity and evolutionary ecology: The harmonious dissonance.  
783 *Trends Immunol.* **39**, 862–873 (2018).
- 784 96. Casadevall, A. & Pirofski, L. Host-pathogen interactions: The attributes of virulence. *J.*  
785 *Infect. Dis.* **184**, 337–344 (2001).
- 786 97. Gherardini, F., Boylan, J., Lawrence, K. & Skare, J. Metabolism and physiology of *Borrelia*.  
787 in *Borrelia: Molecular Biology, Host Interaction and Pathogenesis*. (eds. Samuels, D. &  
788 Radolf, J.) 103–138 (Norfolk: Caister Academic Press, 2010).
- 789 98. Fraser, C. M. *et al.* Genomic sequence of a Lyme disease spirochaete, *Borrelia*  
790 *burgdorferi*. *Nature* **390**, 580–586 (1997).
- 791 99. Jain, S., Sutchu, S., Rosa, P. A., Byram, R. & Jewett, M. W. *Borrelia burgdorferi* harbors a  
792 transport system essential for purine salvage and mammalian infection. *Infect. Immun.* **80**,  
793 3086–3093 (2012).
- 794 100. Groshong, A. M., Dey, A., Bezsonova, I., Caimano, M. J. & Radolf, J. D. Peptide uptake is  
795 essential for *Borrelia burgdorferi* viability and involves structural and regulatory complexity  
796 of its oligopeptide transporter. *mBio* **8**, e02047-17 (2017).
- 797 101. LaRocca, T. J. *et al.* Cholesterol lipids of *Borrelia burgdorferi* form lipid rafts and are  
798 required for the bactericidal mechanism of a complement-independent antibody. *Cell Host*  
799 *Microbe* **8**, 331–342 (2010).
- 800 102. O’Neal, A. J., Butler, L. R., Rolandelli, A., Gilk, S. D. & Pedra, J. H. Lipid hijacking: A  
801 unifying theme in vector-borne diseases. *eLife* **9**, e61675.
- 802 103. Boylan, J. A., Lawrence, K. A., Downey, J. S. & Gherardini, F. C. *Borrelia burgdorferi*  
803 membranes are the primary targets of reactive oxygen species. *Mol. Microbiol.* **68**, 786–  
804 799 (2008).
- 805 104. Crowley, J. T. *et al.* Lipid exchange between *Borrelia burgdorferi* and host cells. *PLOS*  
806 *Pathog.* **9**, e1003109 (2013).
- 807 105. von Lackum, K. & Stevenson, B. Carbohydrate utilization by the Lyme borreliosis  
808 spirochete, *Borrelia burgdorferi*. *FEMS Microbiol. Lett.* **243**, 173–179 (2005).

- 809 106. Kerstholt, M., Netea, M. G. & Joosten, L. A. B. *Borrelia burgdorferi* hijacks cellular  
810 metabolism of immune cells: Consequences for host defense. *Ticks Tick-Borne Dis.* **11**,  
811 101386 (2020).
- 812 107. Lin, M. & Rikihisa, Y. *Ehrlichia chaffeensis* and *Anaplasma phagocytophilum* lack genes for  
813 lipid biosynthesis and incorporate cholesterol for their survival. *Infect. Immun.* **71**, 5324–  
814 5331 (2003).
- 815 108. Toledo, A. & Benach, J. L. Hijacking and use of host lipids by intracellular pathogens.  
816 *Microbiol. Spectr.* **3**, 3.6.13 (2015).
- 817 109. Winchell, C. G., Steele, S., Kawula, T. & Voth, D. E. Dining in: intracellular bacterial  
818 pathogen interplay with autophagy. *Curr. Opin. Microbiol.* **29**, 9–14 (2016).
- 819 110. Niu, H., Xiong, Q., Yamamoto, A., Hayashi-Nishino, M. & Rikihisa, Y. Autophagosomes  
820 induced by a bacterial Beclin 1 binding protein facilitate obligatory intracellular infection.  
821 *Proc. Natl. Acad. Sci. U. S. A.* **109**, 20800–20807 (2012).
- 822 111. Truchan, H. K. *et al.* The Pathogen-occupied vacuoles of *Anaplasma phagocytophilum* and  
823 *Anaplasma marginale* interact with the endoplasmic reticulum. *Front. Cell. Infect. Microbiol.*  
824 **6**, 22 (2016).
- 825 112. Rikihisa, Y. Mechanisms of obligatory intracellular infection with *Anaplasma*  
826 *phagocytophilum*. *Clin. Microbiol. Rev.* **24**, 469–489 (2011).
- 827 113. Kültz, D. Evolution of cellular stress response mechanisms. *J. Exp. Zool. Part Ecol. Integr.*  
828 *Physiol.* **333**, 359–378 (2020).
- 829 114. Shaw, D. K. *et al.* Infection-derived lipids elicit an immune deficiency circuit in arthropods.  
830 *Nat. Commun.* **8**, 14401 (2017).
- 831 115. Labandeira-Rey, M. & Skare, J. T. Decreased Infectivity in *Borrelia burgdorferi* Strain B31  
832 is associated with loss of linear plasmid 25 or 28-1. *Infect. Immun.* **69**, 446–455 (2001).
- 833 116. Zückert, W. R. Laboratory maintenance of *Borrelia burgdorferi*. *Curr. Protoc. Microbiol.* **4**,  
834 12C.1.1-12C.1.10 (2007).
- 835 117. Sukumaran, B. *et al.* Receptor interacting protein-2 contributes to host defense against  
836 *Anaplasma phagocytophilum* infection. *FEMS Immunol. Med. Microbiol.* **66**, 211–219  
837 (2012).
- 838 118. Pedra, J. H. F. *et al.* ASC/PYCARD and Caspase-1 regulate the IL-18/IFN- $\gamma$  axis during  
839 *Anaplasma phagocytophilum* infection. *J. Immunol.* **179**, 4783–4791 (2007).
- 840 119. James, A. E., Rogovskyy, A. S., Crowley, M. A. & Bankhead, T. Characterization of a DNA  
841 adenine methyltransferase gene of *Borrelia hermsii* and its dispensability for murine  
842 infection and persistence. *PLOS ONE* **11**, e0155798 (2016).
- 843 120. Bankhead, T. & Chaconas, G. The role of VlsE antigenic variation in the Lyme disease  
844 spirochete: persistence through a mechanism that differs from other pathogens. *Mol.*  
845 *Microbiol.* **65**, 1547–1558 (2007).
- 846 121. Severo, M. S. *et al.* The E3 ubiquitin ligase XIAP restricts *Anaplasma phagocytophilum*  
847 colonization of *Ixodes scapularis* ticks. *J. Infect. Dis.* **208**, 1830–1840 (2013).
- 848 122. Munderloh, U. G. & Kurtti, T. J. Formulation of medium for tick cell culture. *Exp. Appl.*  
849 *Acarol.* **7**, 219–229 (1989).
- 850 123. Simser, J. A., Palmer, A. T., Munderloh, U. G. & Kurtti, T. J. Isolation of a spotted fever  
851 group *Rickettsia*, *Rickettsia peacockii*, in a rocky mountain wood tick, *Dermacentor*  
852 *andersoni*, cell line. *Appl. Environ. Microbiol.* **67**, 546–552 (2001).
- 853 124. Waterhouse, A. *et al.* SWISS-MODEL: homology modelling of protein structures and  
854 complexes. *Nucleic Acids Res.* **46**, W296–W303 (2018).
- 855 125. Benkert, P., Biasini, M. & Schwede, T. Toward the estimation of the absolute quality of  
856 individual protein structure models. *Bioinformatics* **27**, 343–350 (2011).
- 857 126. Ko, J., Park, H., Heo, L. & Seok, C. GalaxyWEB server for protein structure prediction and  
858 refinement. *Nucleic Acids Res.* **40**, W294–W297 (2012).

- 859 127. Abuita, B. H., Schultz, T. L. & O’Riordan, M. X. Mitochondria-derived vesicles deliver  
860 antimicrobial reactive oxygen species to control phagosome-localized *Staphylococcus*  
861 *aureus*. *Cell Host Microbe* **24**, 625-636.e5 (2018).  
862 128. Rus, F. *et al.* Ecdysone triggered *PGRP-LC* expression controls *Drosophila* innate  
863 immunity. *EMBO J.* **32**, 1626–1638 (2013).  
864 129. Waterhouse, A. M., Procter, J. B., Martin, D. M. A., Clamp, M. & Barton, G. J. Jalview  
865 Version 2--a multiple sequence alignment editor and analysis workbench. *Bioinformatics*  
866 **25**, 1189–1191 (2009).  
867 130. Mistry, J. *et al.* Pfam: The protein families database in 2021. *Nucleic Acids Res.* **49**, D412–  
868 D419 (2021).  
869

870 **FIGURE LEGENDS**

871 **Figure 1 / The tick UPR responds to and restricts bacterial colonization.** (a) Graphic  
872 representation of the unfolded protein response (UPR) in mammals. (b) UPR gene expression  
873 in *A. phagocytophilum*-infected *I. scapularis* nymphs relative to uninfected controls (dotted line).  
874 Each point is representative of 1 nymph. Gene expression was quantified by qRT-PCR. (c-e)  
875 ISE6 cells ( $1 \times 10^6$ ) were infected with *A. phagocytophilum* MOI 50 for 18 hours following a 24  
876 hour treatment with either (c) thapsigargin, (d) tunicamycin, or (e) siRNA targeting the negative  
877 regulator *bip*. Gene silencing and *A. phagocytophilum* load (16s rDNA) was measured by qRT-  
878 PCR. All data shown are representative of 5 biological replicates with least two technical  
879 replicates  $\pm$  SEM. Student's t-test. \*P < 0.05. scRNA, scrambled RNA; siRNA, small interfering  
880 RNA; NS, not significant. See also Supplemental Figure 1 and Supplemental Table 1.

881 **Supplemental Figure 1 (Related to Figure 2) | UPR molecules are conserved in the *I.***  
882 ***scapularis* genome.** (a-d) Amino acid sequence alignment of BiP, IRE1 $\alpha$ , TRAF2, and XBP1  
883 between *H. sapiens* and *I. scapularis*. Alignments were created using available sequences from  
884 NCBI imported into Jal view. Shaded regions indicate amino acid physiochemical property  
885 conservation. Good conservation between sequences was observed for (a) BiP, (b) the IRE1 $\alpha$   
886 protein kinase domain (light blue box) and RNase domain (grey box), (c) the TRAF-type zinc  
887 finger domain of TRAF2 (yellow box), and (d) the basic region leucine zipper (bZIP) domain in  
888 XBP1 (blue box). (e) Nucleotide sequence for *I. scapularis xbp1* mRNA. The internal intron that  
889 is spliced by the RNase domain of IRE1 $\alpha$  is underlined in blue. Cleavage sites are indicated by  
890 red lettering and black arrows indicate primer sites used to confirm *xbp1* splicing by PCR.

891 **Figure 2 | The IRE1 $\alpha$  branch of the UPR is induced by *A. phagocytophilum* through**  
892 **TRAF2.** (a) Phosphorylated IRE1 $\alpha$  immunoblot against ISE6 ( $1 \times 10^6$ ) cells treated with either the  
893 IRE1 $\alpha$  inhibitor KIRA6 (K6; 1 hour), infected with *A. phagocytophilum* (*A.p.*; 24 hours) or in



894 combination (1 hour KIRA6 pretreatment, followed by *A. phagocytophilum* infection for 24 hours;  
895 K6 + *A.p.*). Immunoblot shown is representative of 2 biological replicates. Protein expression  
896 differences were quantified by ImageJ and are expressed as a ratio of phosphorylated IRE1 $\alpha$   
897 (~110 kDa) to the internal loading control,  $\beta$ -actin (45 kDa). ISE6 cells were treated with **(b)** the  
898 IRE1 $\alpha$  inhibitor KIRA6 (1 hour) or **(c and f)** siRNAs to silence gene expression prior to *A.*  
899 *phagocytophilum* (*A.p.*; MOI 50) infection for 18 hours. Gene silencing and *A. phagocytophilum*  
900 burden were measured by qRT-PCR. Experiments shown are representative of at least two  
901 technical replicates  $\pm$  SEM. Student's t-test. \*P < 0.05. **(d)** ISE6 cells ( $1 \times 10^6$ ) were either  
902 untreated (-), stimulated with 0.5  $\mu$ M of thapsigargin (TG), or infected with *A. phagocytophilum*  
903 (*A.p.*; MOI 50) for indicated time points. **(e)** Replete *I. scapularis* nymphs were fed either on  
904 uninfected mice (-), *A. phagocytophilum* (*A.p.*)-infected, or *B. burgdorferi* (*B.b.*)-infected mice.  
905 **(d-e)** cDNA was synthesized from RNA and used to evaluate *xbp1* splicing by PCR. Samples  
906 were analyzed on a 3% agarose gel. scRNA, scrambled RNA; siRNA, small interfering RNA.  
907 See also Supplemental Figure 1 and Supplemental Table 1.

908 **Supplemental Figure 2 (Related to Figure 2) | Thapsigargin and tunicamycin induce**

909 **IRE1 $\alpha$  phosphorylation in tick cells.** **(a)** Phosphorylated IRE1 $\alpha$  immunoblot against ISE6  
910 ( $1 \times 10^6$ ) cells treated with ER stress inducers tunicamycin (Tu; 50 nM) and thapsigargin (TG; 50  
911 nM) for 24 hours. Immunoblot shown is representative of 2 biological replicates. Protein  
912 expression differences were quantified by ImageJ and are expressed as a ratio of  
913 phosphorylated IRE1 $\alpha$  (~110 kDa) to the internal loading control,  $\beta$ -actin (45 kDa).

914 **Supplemental Figure 3 (Related to Figure 3) | *Ixodes* IRE1 $\alpha$  and TRAF2 homology models.**

915 **(a)** Domain comparison between human TRAF2 and *Ixodes* TRAF2 proteins. Really Interesting  
916 New Gene (RING; orange). Zinc finger (green). TRAF N-domain (blue). TRAF C domain (red).  
917 **(b)** The *Ixodes* TRAF2 homology model is a trimer with three chains labeled A (purple), B  
918 (magenta), and C (yellow). Part of the coiled-coil domain is modeled as a single alpha helix and

919 the TRAF-C domain forms an eight-stranded antiparallel  $\beta$ -sandwich. **(c)** *Ixodes* IRE1 $\alpha$   
920 homology model of the dimer RNase/kinase domain. The kinase region consists of an N-lobe  
921 (yellow) and C-lobe (aqua). **(d)** Residues of the kinase-extension nuclease (KEN) domain (top)  
922 and the kinase domain (bottom) are predicted to participate in salt bridge formation and  
923 dimerization. Residues at the KEN domain interface predicted to form salt bridges are shown in  
924 the top panel. Residues at the nucleotide binding pocket coordinate MgADP and are conserved  
925 with human IRE1 $\alpha$  (middle panel). Salt bridge-forming residues at the kinase domain are  
926 predicted to participate in IRE1 $\alpha$  dimerization (bottom panel).

927 **Figure 3 | *Ixodes* IRE1 $\alpha$  - TRAF2 molecular interactions.** **(a)** The interfaces assigned by  
928 CPORT for the *Ixodes* TRAF2 trimer and IRE1 $\alpha$  homology models. Active central (cyan) and  
929 passive peripheral (navy blue) residues shown as spheres were used to filter the docking  
930 solutions in HADDOCK 2.2. **(b)** Final docking model between *Ixodes* TRAF2 and IRE1 $\alpha$  places  
931 TRAF2 away from the dimer interface and the C-terminus of IRE1 $\alpha$  (black circle), which anchors  
932 IRE1 $\alpha$  to the ER. **(c)** Salt bridges were determined between all three chains of *Ixodes* TRAF2  
933 and IRE1 $\alpha$  with a measured distance between 2.7 - 2.8 Å. Negatively charged Asp and Glu  
934 residues (red spheres) pair with positively charged Lys, Arg, and His residues (blue spheres).  
935 **(d)** Immunoprecipitation (IP) analysis followed by Western blotting (WB) showing interaction  
936 between FLAG-tagged *Ixodes* IRE1 $\alpha$  and HA-tagged *Ixodes* TRAF2 expressed in HEK 293T  
937 cells. WB is representative of two biological replicates. See also Supplemental Figure 3 and  
938 Supplemental Table 1.

939 **Figure 4 | Vector competence for *A. phagocytophilum* is influenced by *Ixodes* IRE1 $\alpha$  and**  
940 **TRAF2 at multiple life stages *in vivo*.** *I. scapularis* **(a-b)** nymphs or **(c-d)** larvae had *ire1a* and  
941 *traf2* expression silenced through RNAi prior to feeding on *A. phagocytophilum*-infected mice.  
942 Silencing levels and bacterial load were measured in whole *I. scapularis* nymphs or larvae. **(e)**  
943 Schematic of *ex vivo* *I. scapularis* midgut and salivary gland cultures. **(f-g)** Midguts and salivary

944 glands from *I. scapularis* adults were dissected, cultured, and treated with 1  $\mu$ M of KIRA6 (1  
945 hour) followed by *A. phagocytophilum* infection for 24 hours. Silencing levels and *A.*  
946 *phagocytophilum* load (16s rDNA) were measured by qRT-PCR. Each point represents 1 tick,  
947 midgut, or pair of salivary glands (two technical replicates each),  $\pm$  SEM. Welch's t-test. \*P <  
948 0.05. scRNA, scrambled RNA; siRNA, small interfering RNA. See also Supplemental Table 1.

949 **Figure 5 | *Ixodes* IRE1 $\alpha$  and TRAF2 restrict *B. burgdorferi* colonization *in vivo* at multiple**  
950 **tick life stages.** RNAi silencing of *ire1 $\alpha$*  and *traf2* in *I. scapularis* (a-b) nymphs or (c-d) larvae  
951 was performed prior to feeding on *B. burgdorferi*-infected mice. Silencing levels and *B.*  
952 *burgdorferi* (*flaB*) were measured in whole *I. scapularis* nymphs or larvae. Each point represents  
953 1 tick (two technical replicates each)  $\pm$  SEM. Welch's t-test. \*P < 0.05. scRNA, scrambled RNA;  
954 siRNA, small interfering RNA. Also see Supplemental Table 1.

955 **Supplemental Figure 4 (Related to Figure 6) | The UPR stimulates IMD pathway-**  
956 **associated antimicrobial peptides.** (a) Indicated concentrations of thapsigargin (TG) were  
957 used to treat S2\* cells ( $1 \times 10^6$ ) for 6 hours prior to examining gene expression differences. (b-c)  
958 S2\* cells ( $1 \times 10^6$ ) were pretreated with KIRA6 (1 hour) before (b) *A. phagocytophilum* (*A.p.*; MOI  
959 50) or (c) *B. burgdorferi* (*B.b.*; MOI 50) infection (6 hours). Gene expression is relative to *rp49*.  
960 Dotted line denotes unstimulated controls. Data shown are representative of 4-5 biological  
961 replicates and two technical replicates. See also Supplemental Table 1.

962 **Figure 6 | Infection-induced IMD pathway activation and ROS production functions**  
963 **through IRE1 $\alpha$ .** (a-c) Relish immunoblot of ISE6 cells stimulated for 1 hour with (a)  
964 thapsigargin (TG) or tunicamycin (Tu), or (b-c) pretreated with KIRA6 (K6) before (b) *A.*  
965 *phagocytophilum* (*A.p.*; MOI 50) or (c) *B. burgdorferi* (*B.b.*; MOI 50) infection (24 hours).  
966 Immunoblots shown are representative of 2-3 biological replicates. Protein expression  
967 differences were quantified by ImageJ and are expressed as a ratio of Relish (~41 kDa) to the

968 internal loading control,  $\beta$ -actin (45 kDa). **(d-f)** ROS assay with ISE6 cells ( $1.68 \times 10^5$ ) stimulated  
969 with **(d)** thapsigargin (TG; 10 nM) or tunicamycin (Tu; 50 nM), **(e-f)** ROS output from ISE6 cells  
970 pretreated with either DPI (5  $\mu$ M) or KIRA6 (1  $\mu$ M) for 1 hour prior to **(e)** *A. phagocytophilum* or  
971 **(f)** *B. burgdorferi* infection. ROS was measured by relative fluorescence units (RFU) after 72  
972 hours. Data shown is representative of 3 biological replicates and 2 technical replicates,  $\pm$  SEM.  
973 Student's t-test. \*P < 0.05. (-), vehicle control; DPI, diphenyleneidonium.

974 **Figure 7 | IRE1 $\alpha$  and TRAF2-mediated pathogen restriction is conserved across ticks.**

975 DAE100 cells ( $5 \times 10^5$ ) were treated with indicated concentrations of **(a)** thapsigargin, **(b)**  
976 tunicamycin, or **(c)** KIRA6 followed by infection with *A. marginale* (MOI 50) for 18 hours.  
977 Student's t-test. \*P < 0.05. **(d)** Schematic of *ex vivo* *D. andersoni* midgut and salivary gland  
978 cultures. **(e-f)** Midguts and salivary glands from *D. andersoni* adults were dissected, cultured,  
979 and treated with 1  $\mu$ M of KIRA6 (1 hour) followed by *A. marginale* infection for 22 hours. *A.*  
980 *marginale* (*rpoH*) was quantified by qRT-PCR and graphed relative to  $\beta$ -actin. Welch's t-test. \*P  
981 < 0.05. Each point is representative of 1 tick, midgut, or pair of salivary glands (two technical  
982 replicates),  $\pm$  SEM. See also Supplemental Table 1.

983 **Supplemental Figure 5 | The UPR triggers the IMD pathway in ticks.** Tick-borne bacteria *A.*  
984 *phagocytophilum* and *B. burgdorferi* stimulate the UPR in *I. scapularis* ticks. IRE1 $\alpha$  is activated  
985 by phosphorylation (P) and pairs with TRAF2. This signaling axis induces the IMD pathway,  
986 Relish activation, and antimicrobial responses that restrict pathogen colonization.

987

988 **Acknowledgements**

989 We are grateful to Ulrike Munderloh (University of Minnesota) for providing ISE6 and DAE100  
990 tick cell lines; Jon Skare (Texas A&M Health Science Center) for providing *B. burgdorferi* B31  
991 (MSK5); BEI Resources and Oklahoma State University for *Ixodes scapularis* ticks, and for the  
992 Addgene plasmid #32530 which was received as a gift from Christopher A. Walsh.

993 **Funding**

994 This work is supported by the National Institutes of Health (R21AI139772 to D.K.S.), the WSU  
995 Intramural CVM grants program, funded in part by the National Institute of Food and Agriculture  
996 and the Joseph and Barbara Mendelson Endowment Research Fund (to D.K.S.) and  
997 Washington State University, College of Veterinary Medicine. Additional support to L.C.S-L.  
998 came from The Fowler Emerging Diseases Graduate Fellowship funded by Ralph and Maree  
999 Fowler. J.H. was a trainee under the Institutional Training Grant T32 from the National Institute  
1000 of Allergy and Infection Diseases (T32GM008336). The content is solely the responsibility of the  
1001 authors and does not necessarily represent the official views of the National Institute of Allergy  
1002 and Infection Diseases or the National Institutes of Health.

1003 **Author contributions**

1004 L.C.S-L., K.L.R. and D.K.S. designed the study. L.C.S-L., K.L.R., N.P., J.K.U, J.H., and D.K.S.  
1005 performed experiments. N.P. and J.W.P. performed homology modeling and IRE1 $\alpha$ -TRAF2  
1006 docking. S.M.N. and J.K.U. contributed reagents and performed *D. andersoni* experiments.  
1007 E.A.F. designed and constructed Supplemental Figure 5. L.C.S-L., K.L.R., N.P., A.S.G, J.W.P.,  
1008 and D.K.S. analyzed data. All authors provided intellectual input into the study. L.C.S-L., K.L.R.,  
1009 N.P., and D.K.S. wrote the manuscript; all authors contributed to editing.

**Figure 1 | The tick UPR responds to and restricts bacterial colonization**

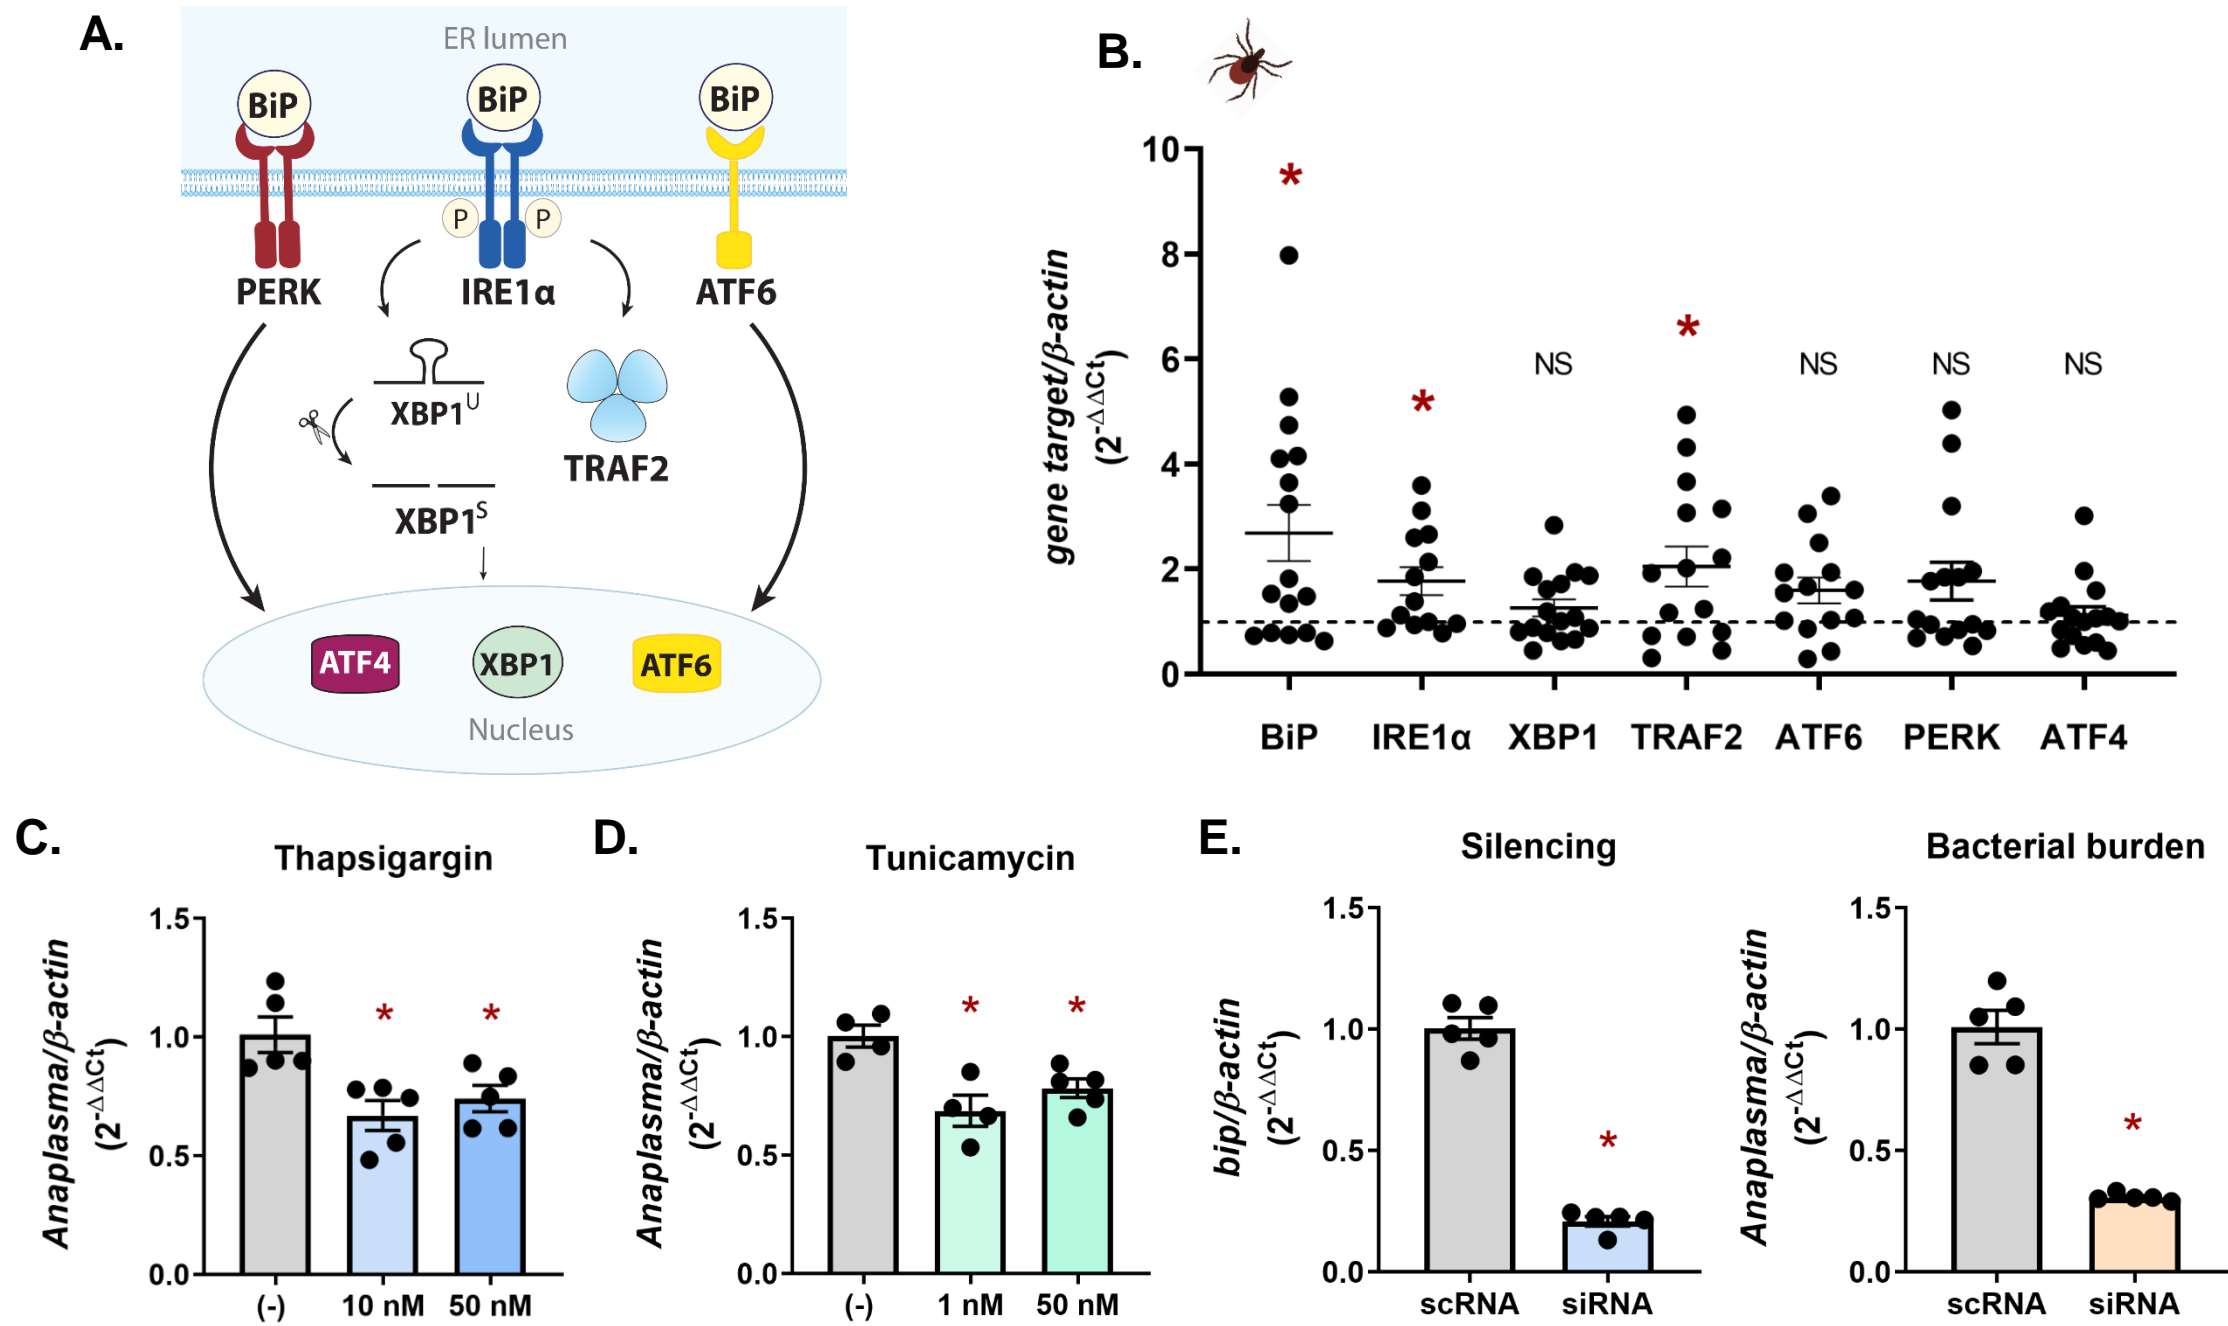

Figure 2 | The IRE1α branch of the UPR is induced by *A. phagocytophilum* through TRAF2

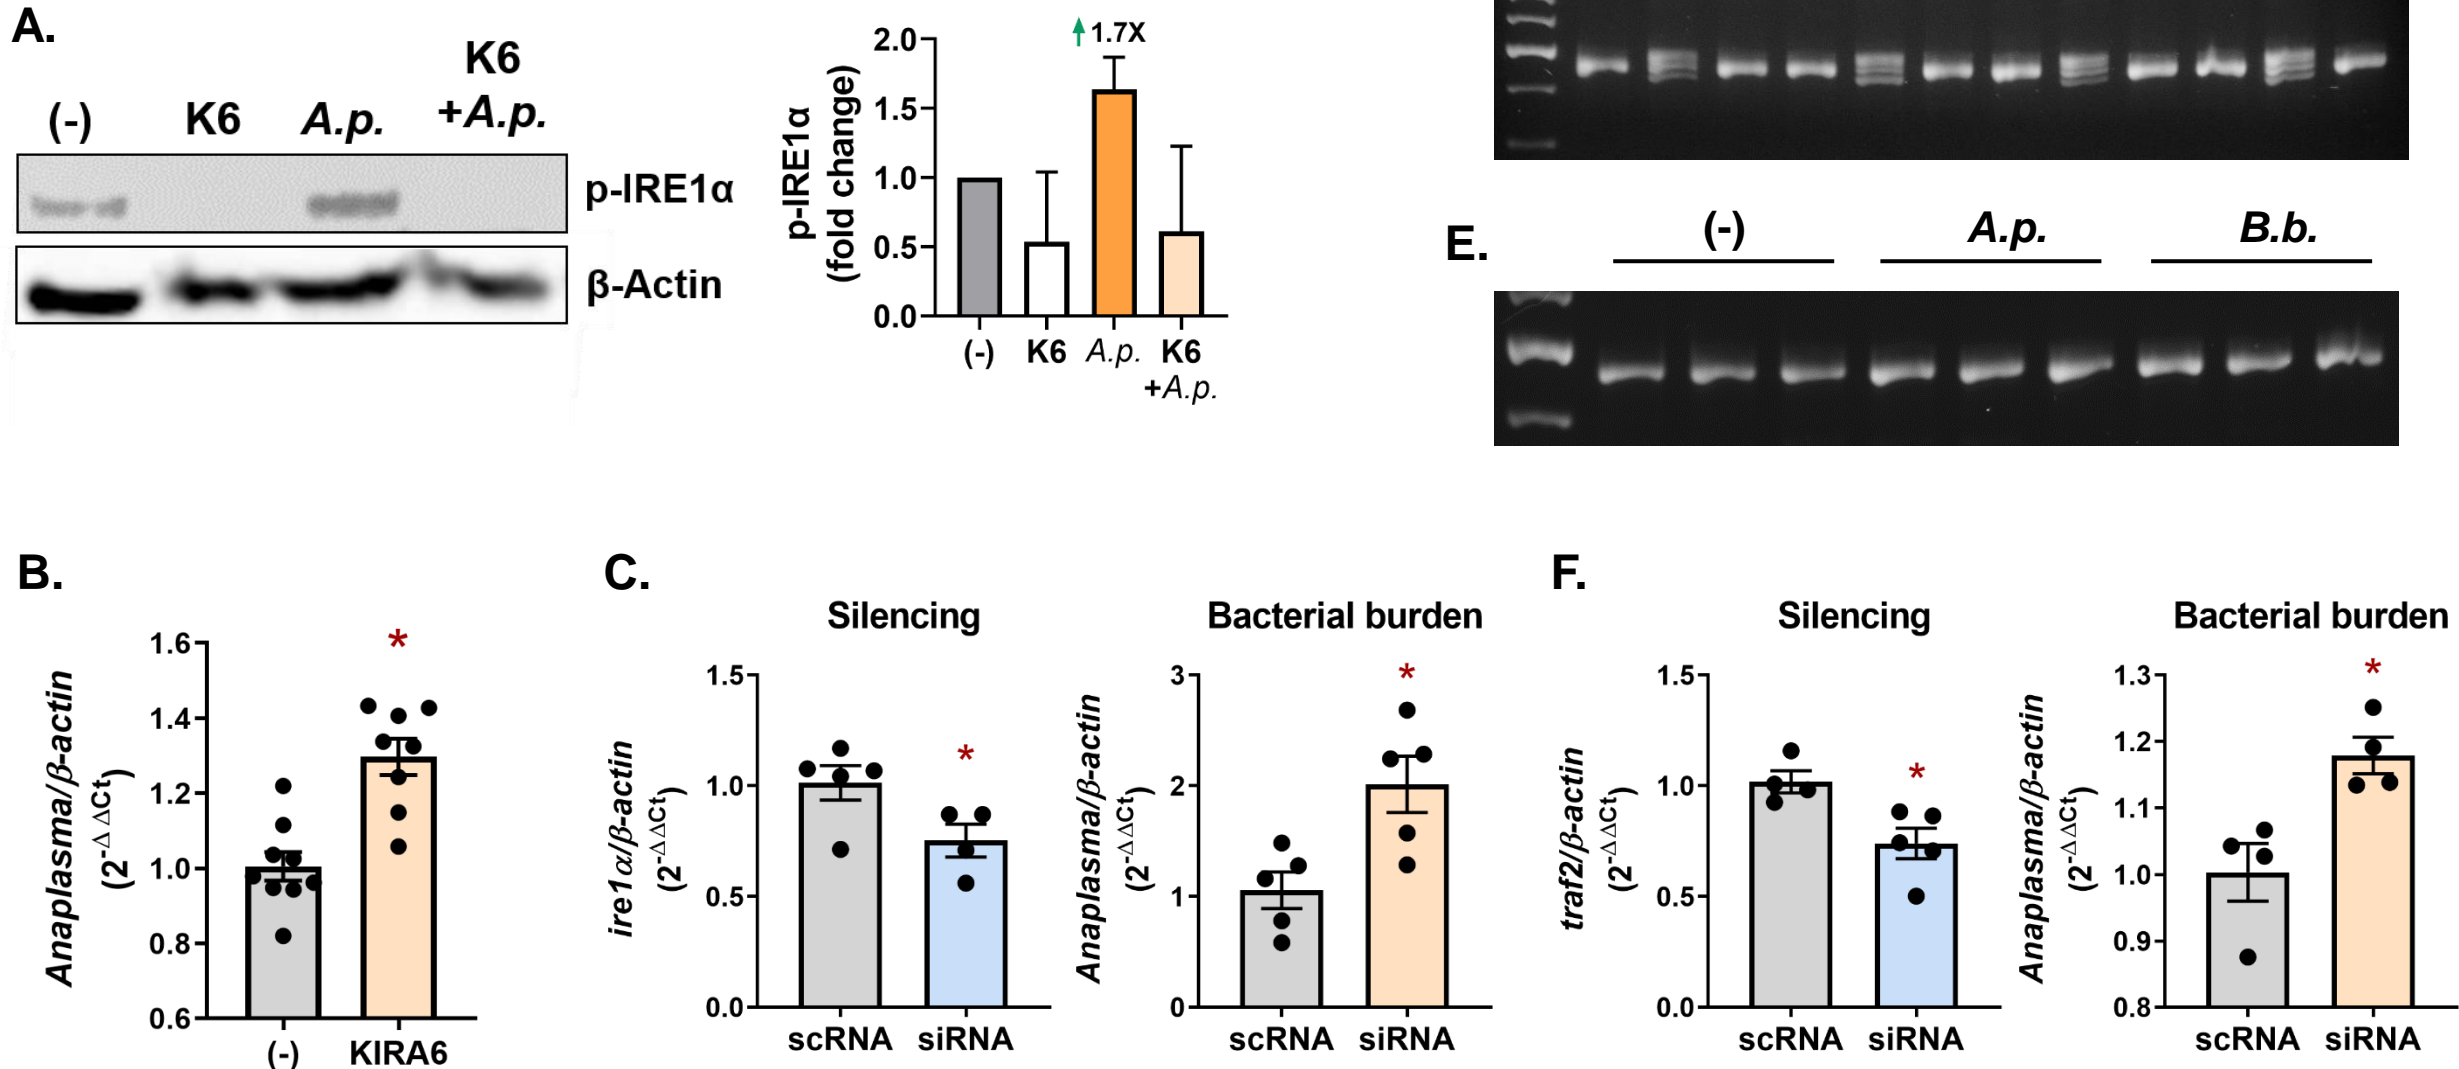

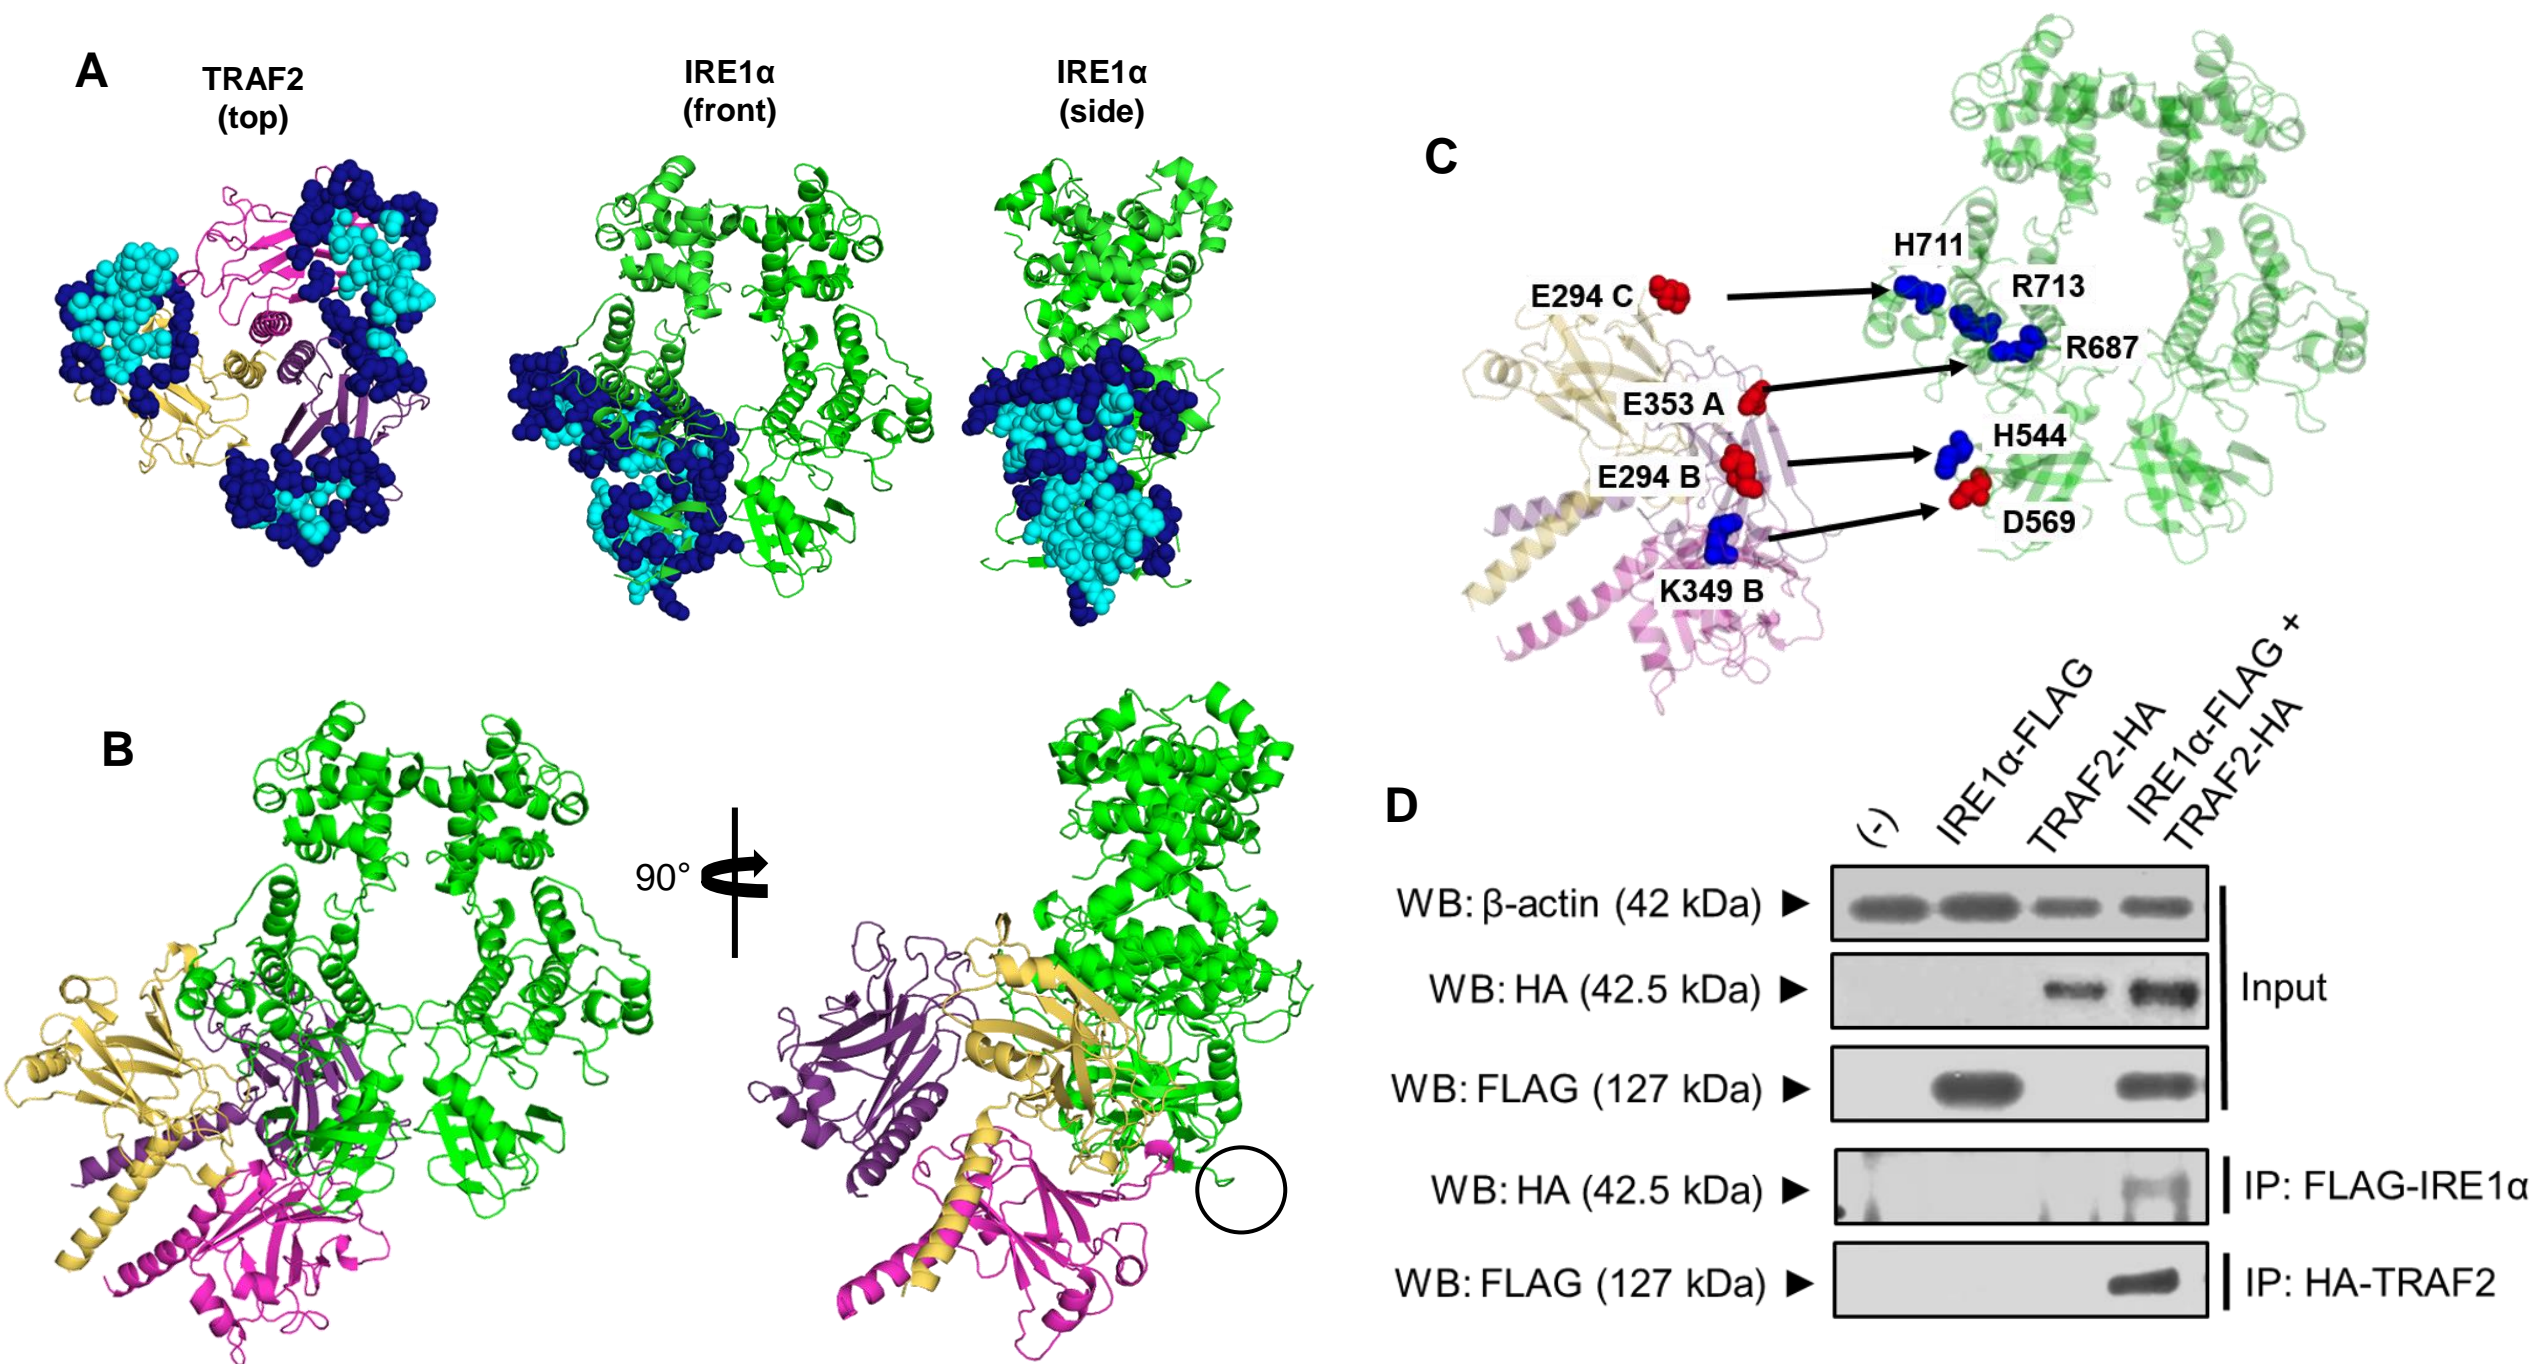

Figure 3 | *Ixodes* IRE1 $\alpha$  - TRAF2 molecular interactions



**Figure 4 | Vector competence for *A. phagocytophilum* is influenced by *Ixodes* IRE1 $\alpha$  and TRAF2 at multiple life stages *in vivo***

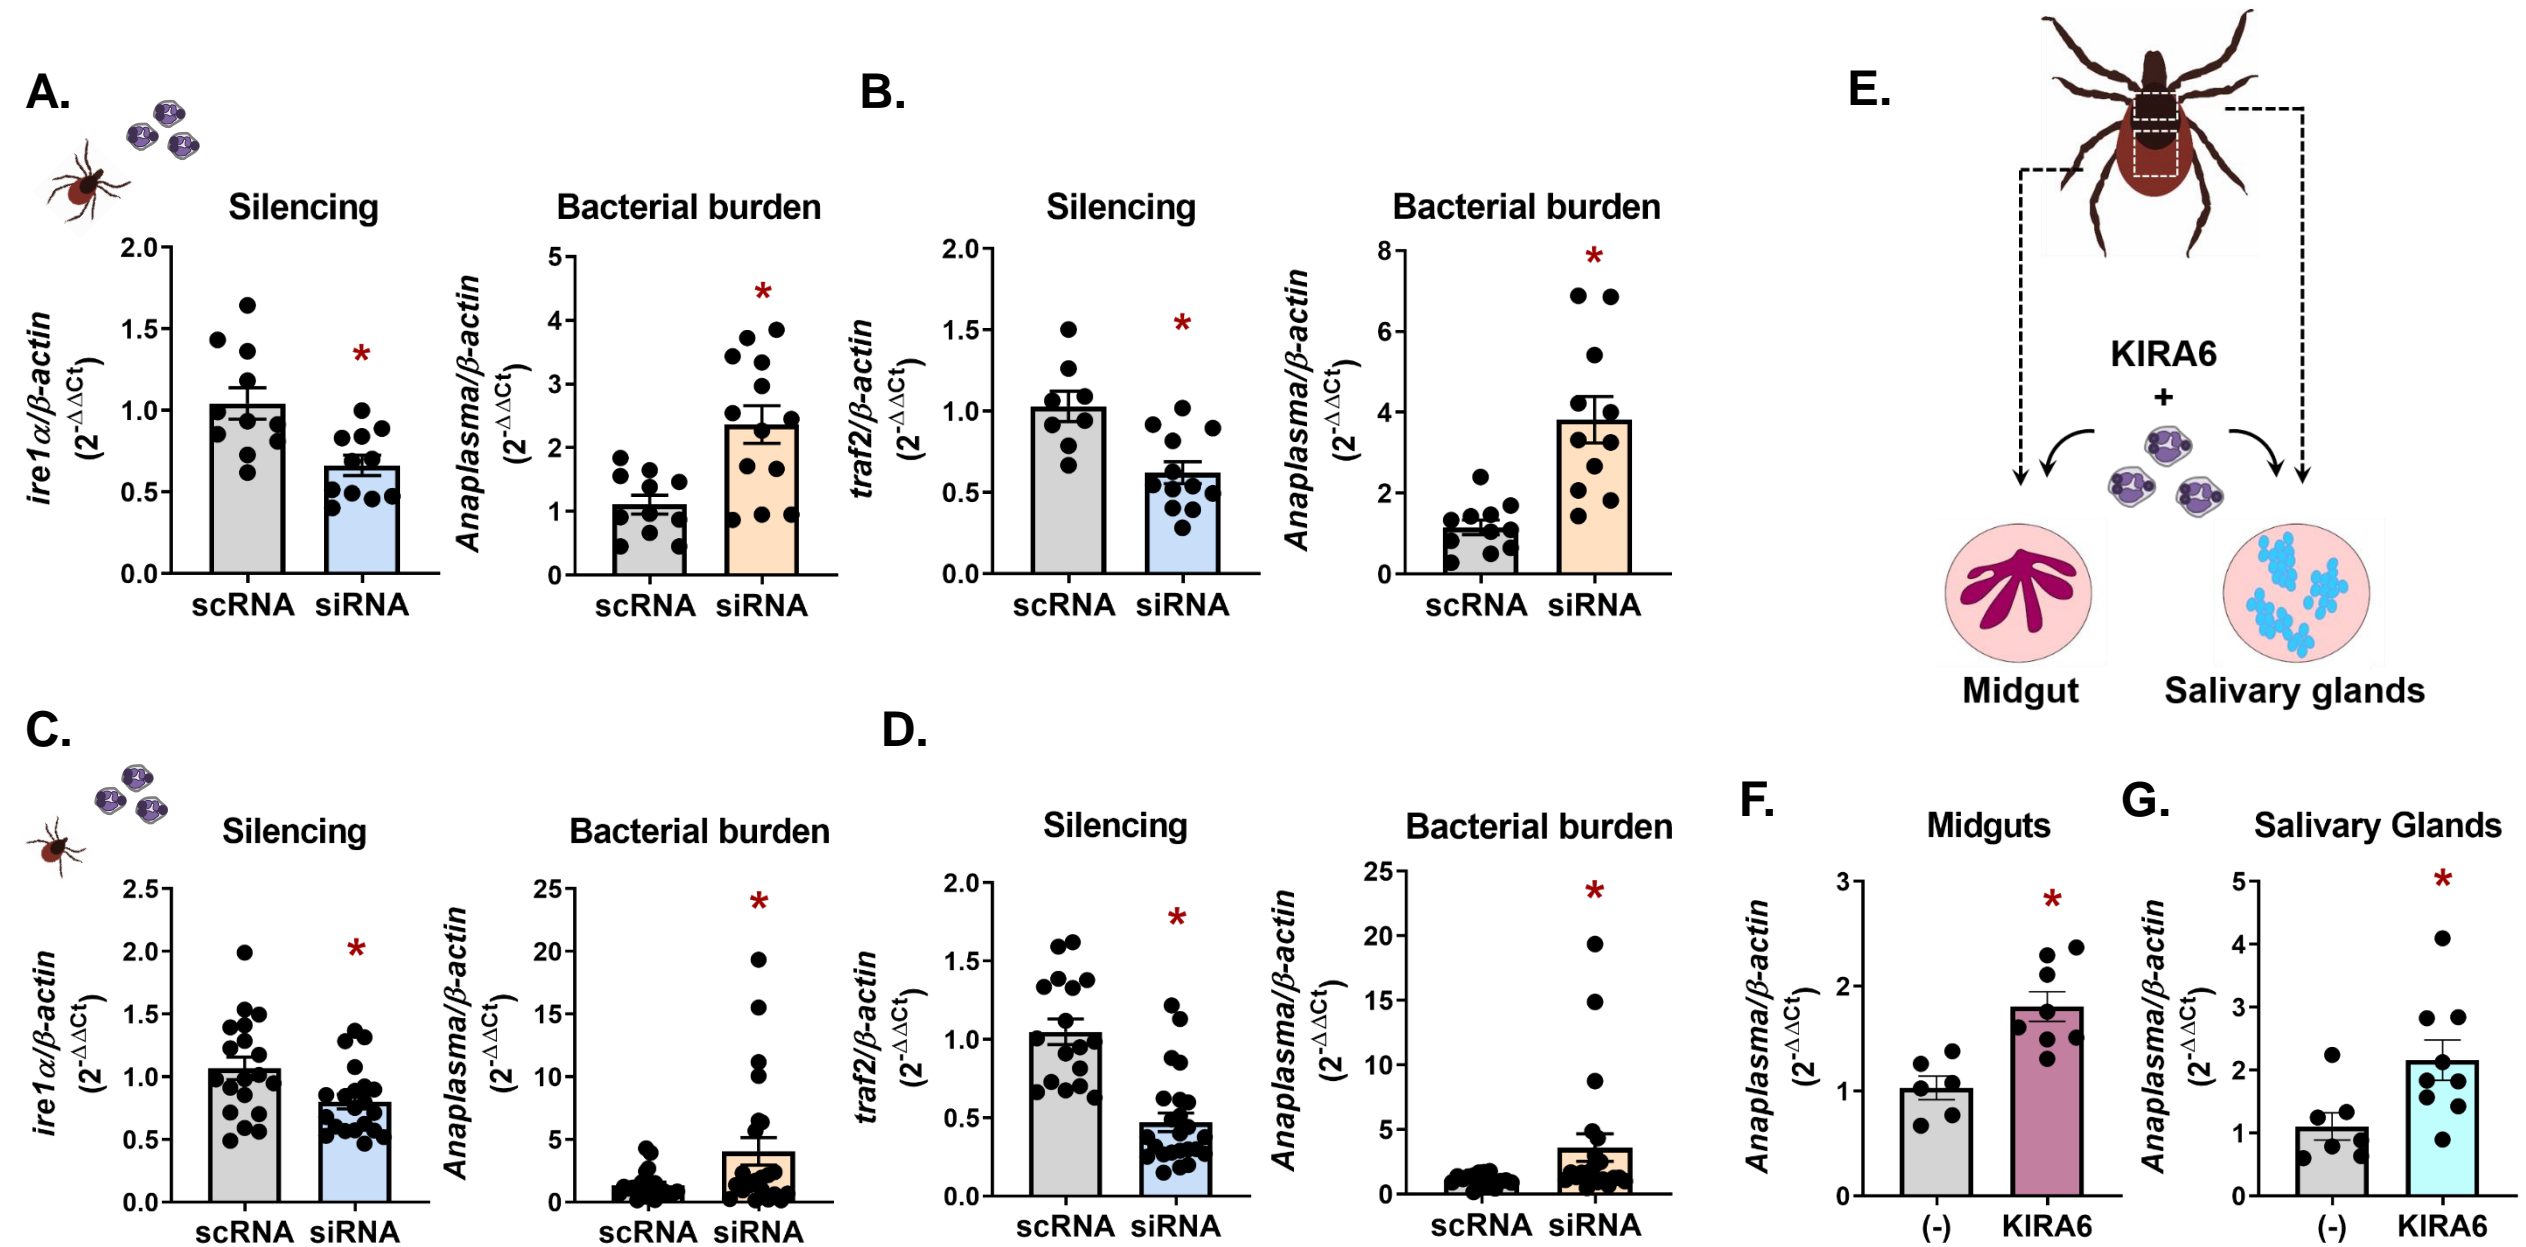

Figure 5 | *Ixodes* IRE1 $\alpha$  and TRAF2 restrict *B. burgdorferi* colonization *in vivo* at multiple tick life stages

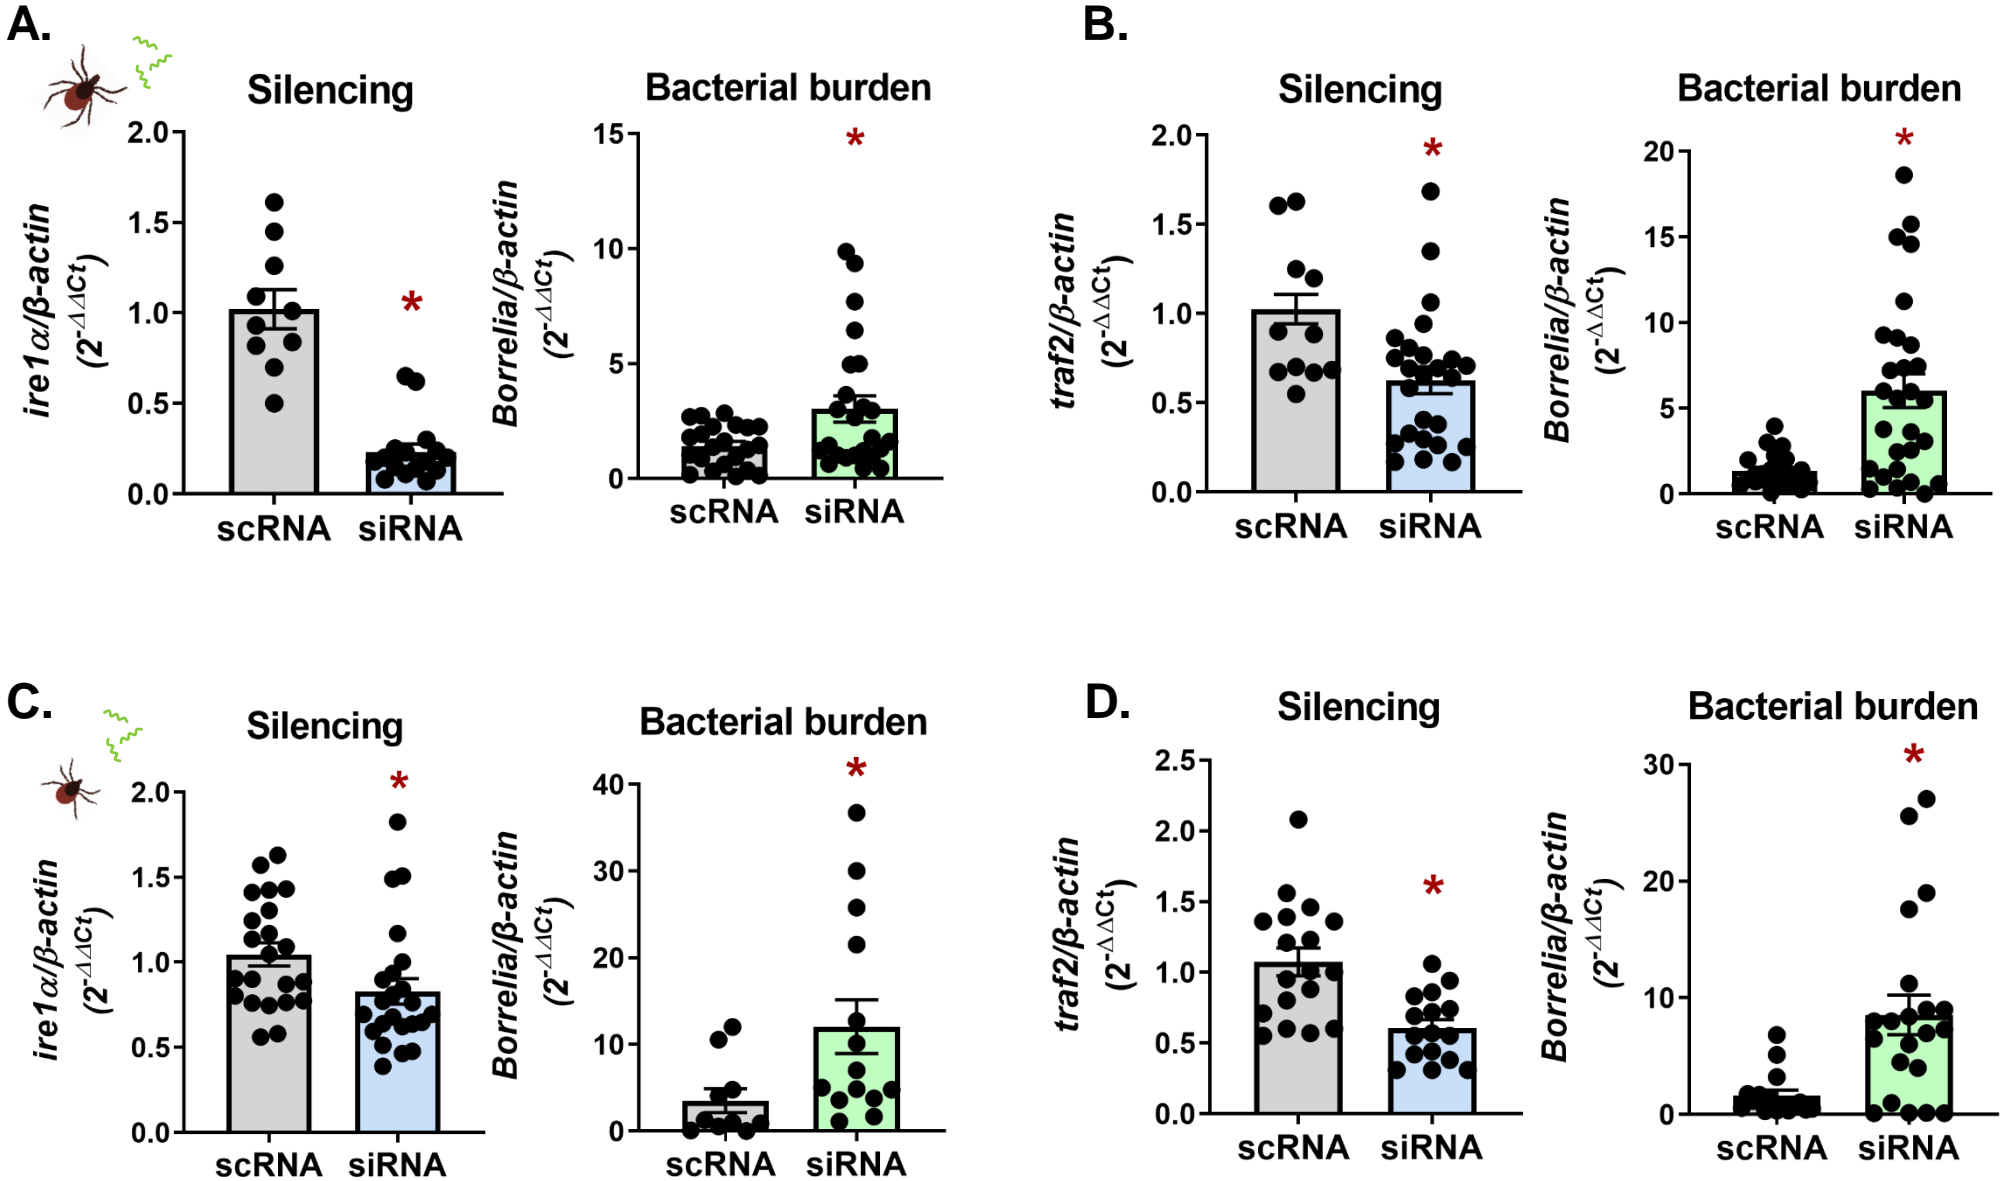

Figure 6 | Infection-induced IMD pathway activation and ROS production functions through IRE1 $\alpha$

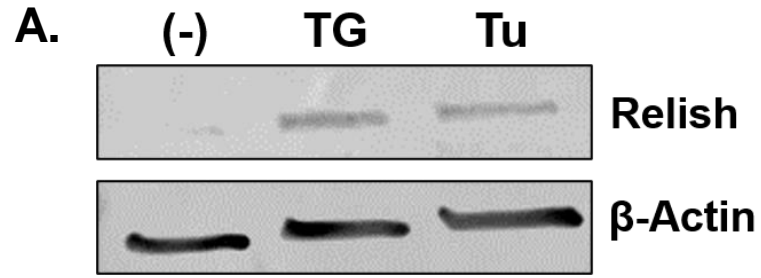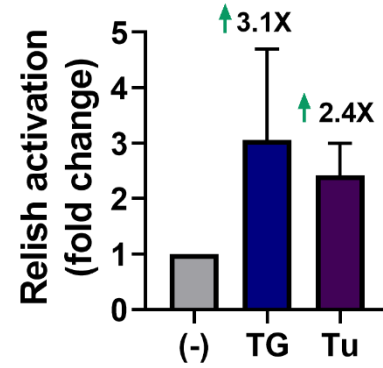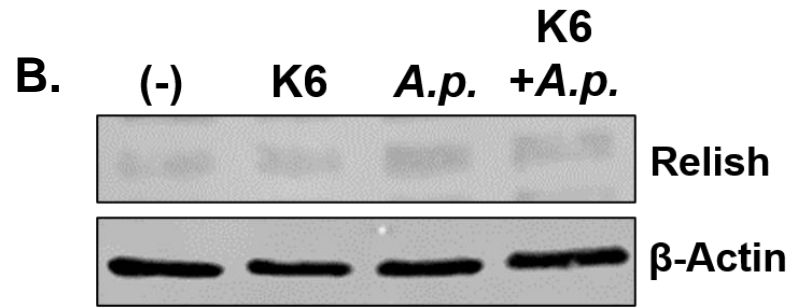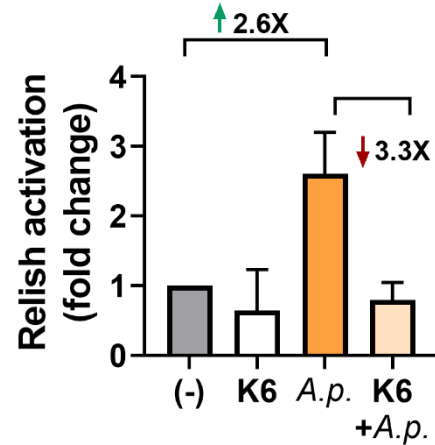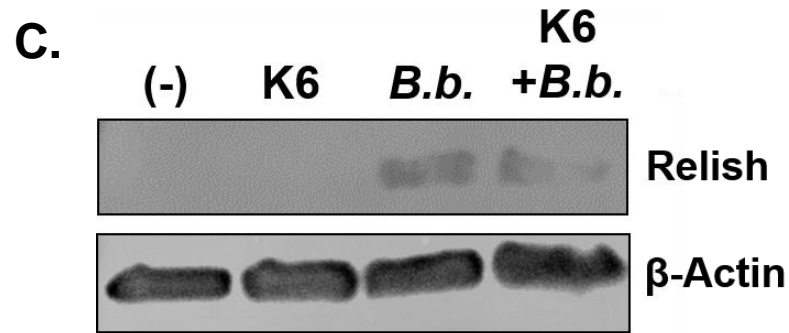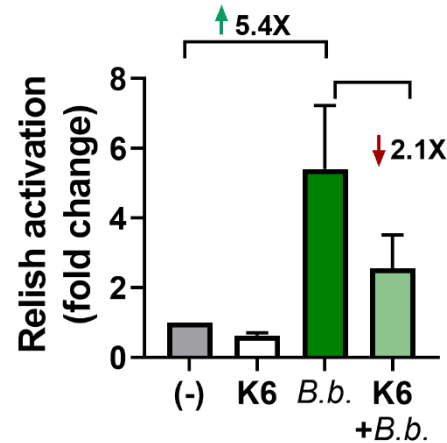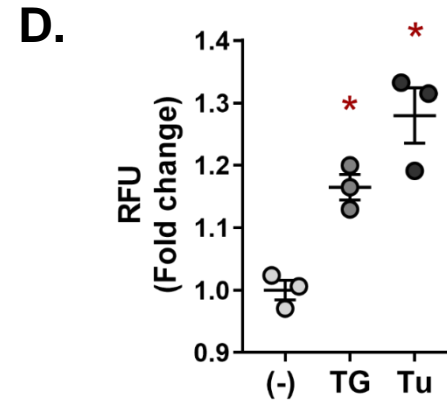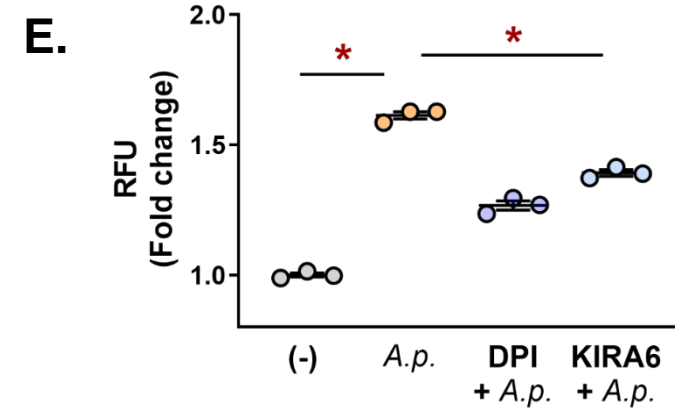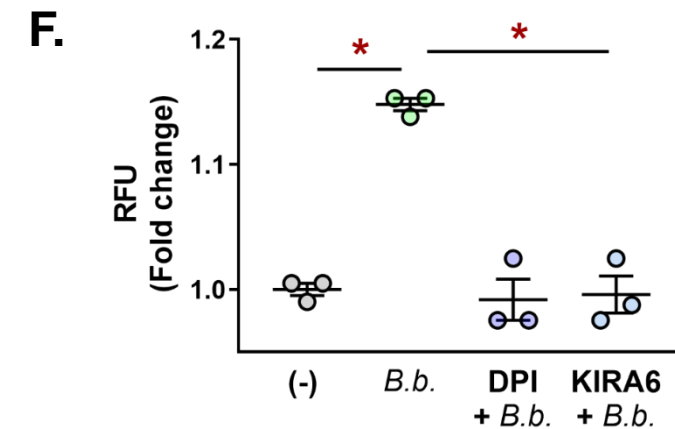

Figure 7 | IRE1 $\alpha$  and TRAF2-mediated pathogen restriction is conserved across arthropod vectors

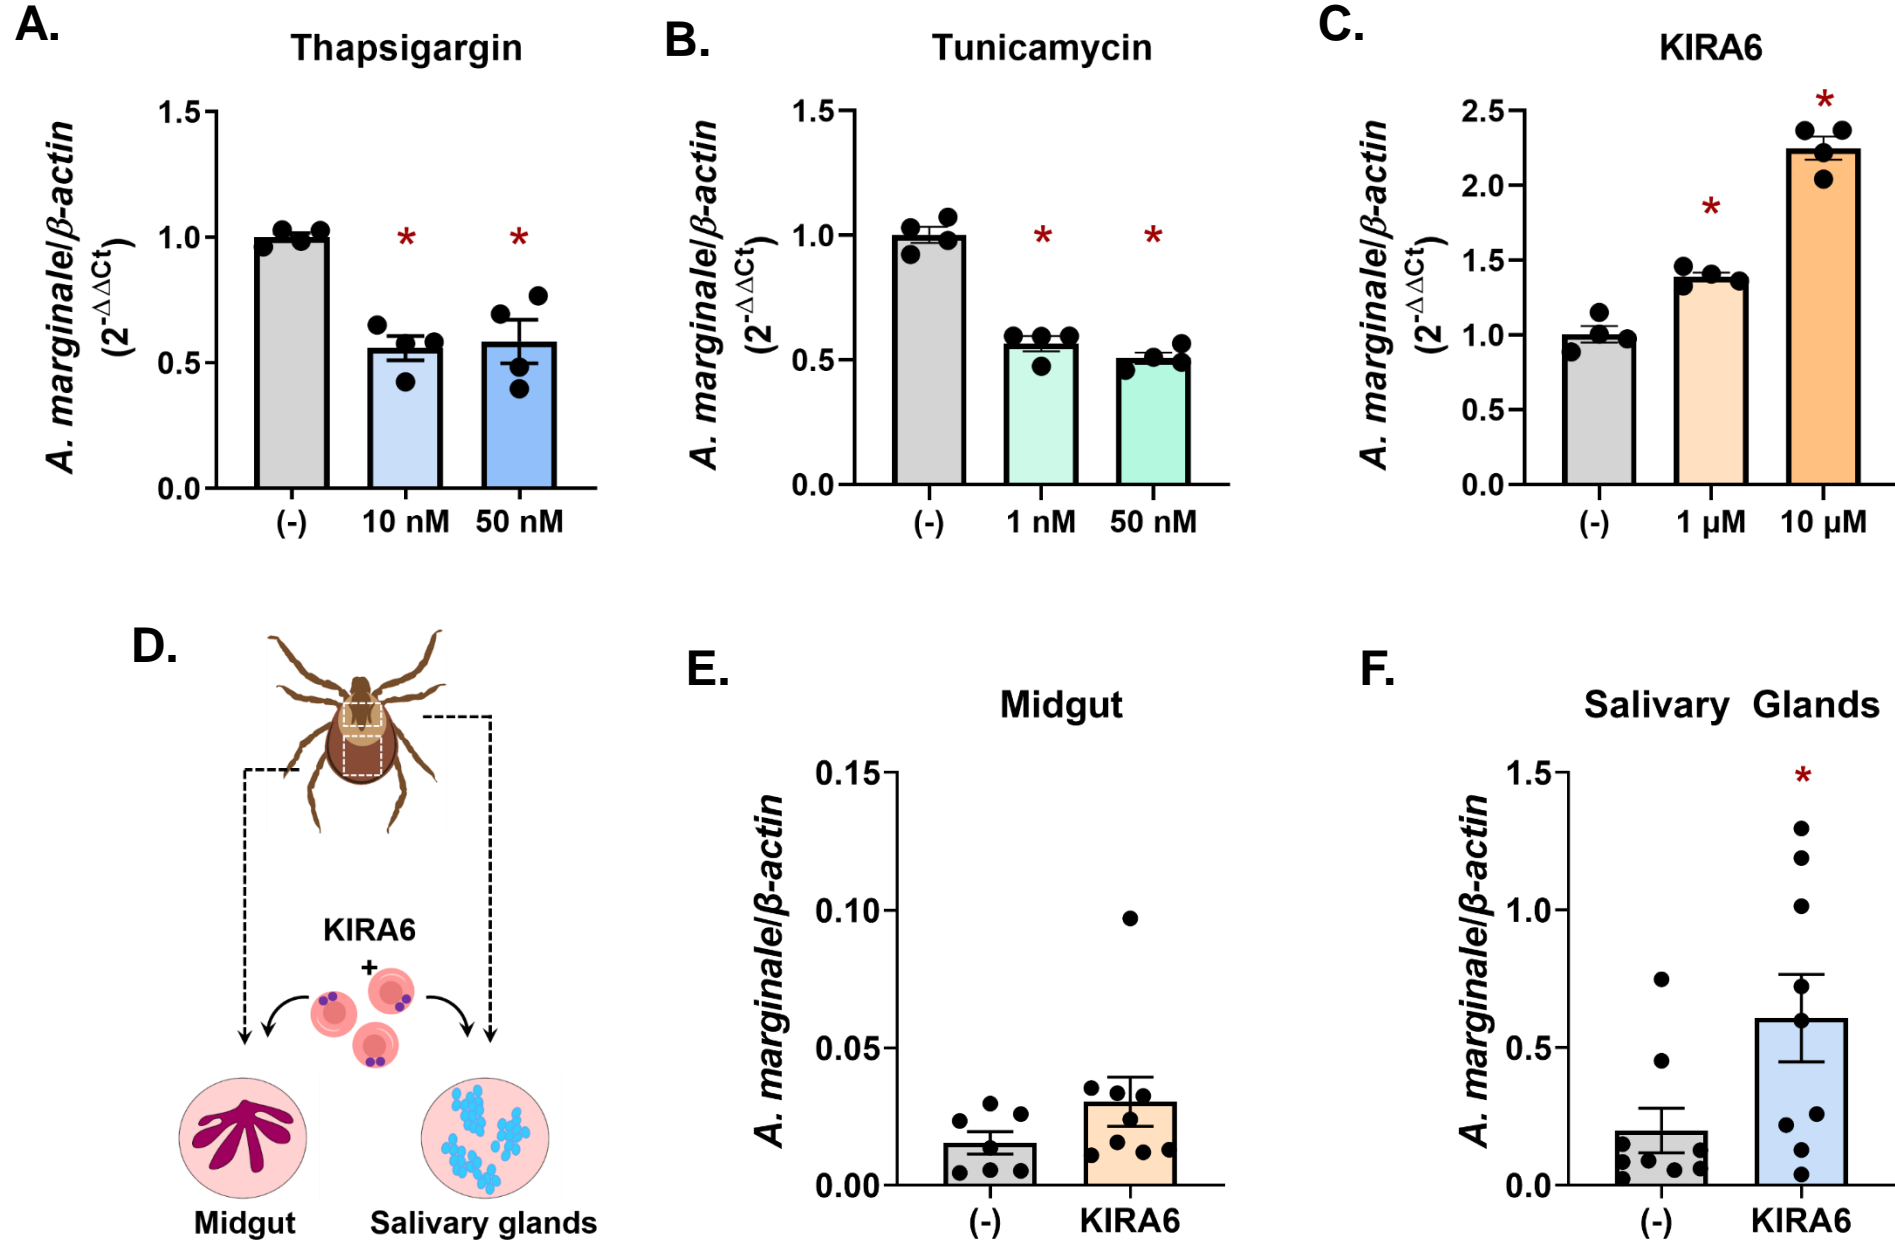

Source: https://www.biorxiv.org/content/10.1101/2021.08.31.458430v2.full.pdf
